1 Food or physics: plankton communities structured across Gulf of Alaska eddies

2

3

4 Caitlin Kroeger\*<sup>1</sup>, Chelle Gentemann<sup>1a,2</sup>, Marisol García-Reyes<sup>1</sup>, Sonia Batten<sup>3,4a</sup>, William

5 Sydeman<sup>1</sup>

6 <sup>1</sup>Farallon Institute, Petaluma, California, United States of America

7 <sup>2</sup>Earth & Space Research, Seattle, Washington, United States of America

8 <sup>3</sup>North Pacific CPR Survey, Marine Biological Association, Nanaimo, British Columbia, Canada

9 <sup>4</sup>North Pacific Marine Science Organization (PICES), Sidney, British Columbia, Canada

10

11

12 <sup>a</sup> Current address

13 \*Corresponding author

14 E-mail: [ckroeger@faralloninstitute.org](mailto:ckroeger@faralloninstitute.org)

15

16

17

18

## 19 Abstract

20 Oceanic features, such as mesoscale eddies that entrain and transport water masses, create  
21 heterogeneous seascapes to which biological communities may respond. To date, however, our  
22 understanding of how internal eddy dynamics influence plankton community structuring is  
23 limited by sparse sampling of eddies and their associated biotic communities. In this paper, we  
24 used 10 years of archived Continuous Plankton Recorder (CPR) data (2002-2013) associated with  
25 9 mesoscale eddies in the Northeast Pacific/Gulf of Alaska to test the hypothesis that eddy origin  
26 and rotational direction determines the structure and dynamics of entrained plankton  
27 communities. Using generalized additive models and accounting for confounding factors (e.g.,  
28 timing of sampling), we found peak diatom abundance within both cyclonic and anticyclonic  
29 eddies near the eddy edge. Zooplankton abundances, however, varied with distance to the eddy  
30 center/edge by rotational type and eddy life stage, and differed by taxonomic group. For  
31 example, the greatest abundance of small copepods was found near the center of anticyclonic  
32 eddies during eddy maturation and decay, but near the edge of cyclonic eddies during eddy  
33 formation and intensification. Distributions of copepod abundances across eddy surfaces were  
34 not mediated by phytoplankton distribution. Our results therefore suggest that physical  
35 mechanisms such as internal eddy dynamics exert a direct impact on the structure of  
36 zooplankton communities rather than indirect mechanisms involving potential food resources.

37

## 38 Introduction

39 Oceanographic features such as flowing currents and rotating mesoscale eddies (approx. 100–  
40 200 km wide) can horizontally transport water masses across ocean basins, creating  
41 heterogeneous seascapes that biological communities thrive on. Eddies, in particular, are  
42 spawned from instabilities in water density gradients or spun off from currents interacting with  
43 topography [1]. Due to entrapment of water at formation, eddies may contain water masses that  
44 are different from their surroundings and highly variable in composition (i.e., nutrients, salinity,  
45 temperature) [2,3]. For example, anticyclonic mesoscale eddies originating from the Alaska  
46 Current are known to transport warm, low salinity, nutrient-rich water containing coastal  
47 plankton offshore into the Gulf of Alaska [4,5]. In addition to horizontally transporting captured  
48 water from their origins, eddies vertically transport water throughout their lifetime (days to  
49 years). Generally, anticyclonic eddies downwell water through their core, whereas cyclonic  
50 eddies upwell deeper, colder, nutrient-rich water layers through their core to the sea surface [6–  
51 9]. This “eddy pumping” of nutrients primarily occurs during formation but the dynamics can  
52 become complicated by other processes such as perturbations to circulation or eddy-induced  
53 Ekman upwelling from wind stress that generally causes surface upwelling (downwelling) in  
54 anticyclonic (cyclonic) eddy centers [6,10], particularly in strong wind regions and seasons where  
55 surface currents are most affected.

56 Eddy-associated surface chlorophyll concentrations and spatial distributions are differently  
57 influenced over time by pumping mechanisms as eddies evolve from formation to maturation to  
58 decay [11]. Moreover, relaxation during decay leads to opposing vertical pumping mechanics

59 from that of formation, with downwelling (upwelling) predicted at cyclonic (anticyclonic) eddy  
60 centers [12]. These processes, in combination with mechanisms such as eddy-induced shifts in  
61 the mixed layer depth and peripheral stirring with surrounding waters as the eddy travels  
62 [11,13], lead to complex combinations of eddy dynamics throughout the eddy lifespan and  
63 ultimately contribute to diverse biological communities in an otherwise oligotrophic basin.

64 Biological communities depend on eddy-driven transport, upwelling, and mixing of nutrient-rich  
65 water [14]. In the Gulf of Alaska, the growth of primary producers such as phytoplankton is often  
66 limited by minerals (e.g., iron [15]) that are more abundant in coastal waters or subsurface water  
67 layers, and these minerals can be reintroduced to depleted regions by the water transport  
68 and/or mixing mechanisms of eddies [5,16,17]. Eddy-driven vertical and horizontal advection of  
69 nutrients has bottom-up effects on biological communities: organisms from plankton to fish to  
70 top predators (i.e., seabirds and marine mammals) depend on such processes, and are often  
71 found in close association with eddies [4,18,19]. However, our understanding of biotic  
72 community structuring within eddies is limited, as it comes from research where only one to a  
73 few eddies were sampled *in situ* (e.g., [20–23]). Plankton sampling typically occurs by net tows at  
74 point locations that are biased toward hard-carapace organisms; by continuous capture via  
75 gauze mesh (i.e., Continuous Plankton Recorder or CPR) that captures soft bodied organisms, but  
76 is analyzed at large intervals (18 km segments every 74 km); or by continuous optical imaging of  
77 small water volumes in single eddies [22,24]. Sampling few eddies or at large intervals is  
78 problematic as there is considerable variability in plankton communities within and across  
79 mesoscale eddies, which can be missed with coarse or sparse sampling. Increased sample sizes  
80 of eddies and plankton abundances within eddies enhances our ability to distinguish the physical

81 mechanisms that are important in shaping biological communities across regions and eddy life  
82 stages.

83 Using 10 years of archived CPR data paired with satellite measures of various long-lived  
84 mesoscale eddies, we increased the temporal and spatial resolution of plankton sampled across  
85 eddies to understand the importance of differing eddy physical dynamics in driving the structure  
86 of biological communities (phytoplankton and zooplankton) in the Gulf of Alaska. With these  
87 data, we tested the following hypotheses: (1) the composition and organization of plankton  
88 communities across marine mesoscale eddies depends on rotational type and eddy origin; (2)  
89 the influence of physical eddy dynamics (e.g., eddy pumping and advection) on plankton  
90 community organization is greater in the early life stage; and (3) eddy dynamics influence  
91 zooplankton communities indirectly through their effects on phytoplankton. We used  
92 generalized additive models (GAMs) to explore the effect of sampling location relative to the  
93 eddy edge on plankton species abundances, while taking into account the effects of year,  
94 season, and time of day. We then implemented nonlinear path analysis to explore the direct and  
95 indirect biophysical relationships between eddy characteristics and plankton densities. These  
96 biophysical connections will provide insight into similar regions that may be lacking in *in situ*  
97 plankton sampling, but have satellite coverage. Moreover, a more nuanced understanding of  
98 biophysical relationships can lead to improved ecological forecasting of fish (e.g., salmonids) and  
99 other wildlife (e.g., whales and seabirds) of societal value that rely on this region of the North  
100 Pacific as feeding grounds.

## 101 Methods

### 102 CPR data

103 Archived CPR samples from transects across the Gulf of Alaska were analyzed according to  
104 standard CPR protocols [25,26], from the Strait of Juan de Fuca to Cook Inlet or the Aleutian  
105 Islands (Fig 1 – map of CPR sample locations/study area), spanning the months of March –  
106 October and December from 2002 to 2013 (Table 1). The CPR is towed behind the ship at a  
107 depth of 7 m, where water flows through the CPR entrance (1.27 cm<sup>2</sup>) into a continuous 270- $\mu$ m  
108 silk mesh net that filters plankton. Phytoplankton and zooplankton captured in the CPR mesh  
109 were cut in 18.5-cm segments and examined with microscopy to identify and count taxonomic  
110 groups. The date, time, and coordinates (degrees latitude and longitude) were associated with  
111 the midpoint of each segment. The phytoplankton taxonomic groups in this study included  
112 diatoms and dinoflagellates. The zooplankton taxonomic groups in this study included  
113 euphausiids, large copepods, small copepods, pteropods, hyperiids, chaetognaths, larvaceans,  
114 and microzooplankton. See [25] for further details on CPR methodology.

### 115 Associated eddy and environmental data

116 Daily mesoscale eddy center location, diameter, rotational direction, and rotational speed were  
117 obtained from the Mesoscale Eddy Trajectory Atlas version 1.0, produced by SSALTO/DUACS and  
118 distributed by AVISO+. Distance from the eddy center to the nearest point of land was calculated  
119 in R with the gDistance function ('rgeos' package [27]). Coastlines were downloaded from NOAA  
120 (GSHHG data version 2.3.7; June 15, 2017). CPR location data were collocated with the eddy

121 database in Python using the Numpy, Xarray, and Pandas libraries [28–30]. Only CPR data that  
122 were within mesoscale eddies or within 200 km from the outer edge of eddies were used within  
123 this study. Additionally, we excluded any eddies that were not transected by the CPR (i.e., eddies  
124 that were close to the CPR, but were not sampled both inside and on their periphery). Canadian  
125 Meteorological Center (CMC) global Sea Surface Temperatures (SSTs) version 2.0 were collocated  
126 with remaining CPR sample points using linear interpolation in time and space [31]. To test the  
127 effect of eddy structuring on plankton abundance, standardized distances were calculated to the  
128 eddy edge from 1) within the eddy, by subtracting the eddy radius from the distance of the CPR  
129 sample to the eddy center divided by the radius, and 2) the outside the eddy, by subtracting the  
130 distance to the edge from the radius divided by the maximum sample distance from the edge  
131 (164 km). The distance of samples from the center of each eddy was visualized to ensure  
132 comparability of eddy distances to the edge between types (Fig 1). In total, 3 cyclonic and 6  
133 anticyclonic eddies sampled twice across a period from 2002 to 2013 were used to describe  
134 eddies and for analyses (Fig 2).

135 **Fig 1. Distribution of plankton samples across eddies in relation to eddy core.** Distance from  
136 plankton samples to eddy center (km) for (a) each eddy and for (b) each eddy rotational type.  
137 Anticyclonic eddies are in blue and cyclonic eddies are in red. The (a) radius or (b) mean radius is  
138 depicted with the horizontal black line within the distributions of points.

139 **Fig 2. Eddy sampling locations in different regions and at different eddy ages.** Sampling of  
140 cyclonic (red) and anticyclonic (blue) eddies within the Gulf of Alaska. Eddy paths begin with a  
141 solid black circle and end with an open black circle. Yellow circles depict sampling periods (both

142 inside and within 164 km from the edge of the eddies). The age in days of the eddy, depicted in  
143 darker (younger) to lighter (older) hues, demonstrates the relative lifespans of the individual  
144 eddies.

## 145 [Statistical Analysis](#)

146 Within each eddy rotational type (anticyclonic and cyclonic), the relative differences in mean log  
147 abundance between taxonomic groups were assessed. First, a nonparametric Kruskal-Wallis  
148 rank sum test (`kruskal.test` function; base R) was used to identify if significant differences  
149 ( $P < 0.05$ ) between groups were present. Where significant differences were found, Dunn's test  
150 post hoc pairwise comparisons were made (`DunnTest` function; 'DescTools' package [32]) using a  
151 Bonferroni correction to determine which taxonomic groups were significantly different.

152 To determine how the physical dynamics of each eddy rotational type influenced community  
153 structure, the abundance of each plankton group was modeled in relation to the distance to the  
154 eddy edge. Generalized additive mixed models (GAMM; `gam` function; 'mgcv' package [33]) were  
155 used to visualize patterns in abundance across eddies. In each model, eddy rotational type  
156 (cyclonic or anticyclonic) was included as a factor interaction with distance to eddy edge to  
157 determine how relationships varied between rotational types. The following potentially  
158 influential predictors were also included in the models: eddy age as percentage of lifespan, eddy  
159 rotational speed, eddy distance to land, day of year, hour of day, eddy ID, and year. Sea surface  
160 temperature was not included as a predictor as it was highly correlated ( $> 0.6$ ) with day of year.  
161 Thin plate regression basis splines were used for all predictors except temporal predictors where  
162 cyclic cubic regression splines were used, and eddy ID and year where random effects were



163 used. A tensor interaction term was included for time of day and day of year, which reduced the  
164 degrees of freedom but improved model residuals. In zooplankton models, total phytoplankton  
165 (diatoms + dinoflagellates) was also included as a predictor. Samples with outlier phytoplankton  
166 counts were removed (n=2). Models were checked for overfitting by comparing the R<sup>2</sup> and  
167 deviance explained between a training and test set of data.

168 Where significant patterns across eddy types were found, the relationships were modeled again  
169 using only Haida eddies (i.e., eddies generated near the Haida Gwaii archipelago; n=301) to parse  
170 the effects of origin on the abundances of plankton across eddy type. Haida eddies were the only  
171 eddy type with enough samples in each eddy rotational group for meaningful analysis (Fig 1 and  
172 S1 Table). Next, to parse the effects of eddy life stage, the same relationships from all regions  
173 were modeled separately within life stage groups defined by an approximate early stage (<25%  
174 of lifespan; n = 277), mature stage (≥25% and ≤80% of lifespan, n=237), and a combined  
175 mature/decay stage (≥25% of lifespan, n = 290) [11]. We examined the mature phase combined  
176 with the decay phase because the sample size for mature stage cyclonic eddies was low (n=48).  
177 The random effect of year was removed from models separated by life stage. A quasi-Poisson  
178 family was used for all GAMs to account for over-dispersed count data as this distribution  
179 performed better than Tweedie or negative binomial distributions. To optimize smoothness  
180 selections, a restricted maximum likelihood method was used and an extra penalty was added to  
181 all terms. Models were checked for concurvity and nonrandom predictors (with the exception of  
182 the main effects of the interaction term) were removed where the observed and estimated  
183 values were >0.80). Model fits were examined by visually inspecting the model residuals and  
184 basis dimensions using the gam.check function [33].

185 The majority of copepod taxa are omnivorous and assumed to be heavy grazers of  
186 phytoplankton, therefore, to examine whether or not the effect of the distance to eddy edge on  
187 zooplankton was direct, or indirectly mediated by phytoplankton abundance, we tested the  
188 influence of total phytoplankton on total (large + small) copepods. We used causal mediation  
189 analysis ('mediation' package; [34]) with 1000 nonparametric bootstrapped simulations and bias-  
190 corrected confidence intervals on the GAMs selected as described above, but we used a Poisson  
191 family distribution. The mediator and outcome models were examined separately for each eddy  
192 type in order to remove any interaction with the 'treatment' variable (distance to eddy edge)  
193 and the tensor interaction term (hour by day of year) was also removed to adjust for the reduced  
194 sample size. The remaining covariate terms were kept consistent between the mediator and  
195 outcome models. Because the distance to eddy edge was continuous and because we were  
196 interested in direct vs indirect effects of phytoplankton within the eddy, a contrast was applied  
197 from the center of the eddy to the eddy edge (control = 0; treatment = -1). As an additional  
198 check, the data were filtered to remove all points outside the eddies and a manual stepwise  
199 mediation (as established in [35]) was applied to GAMs where distance to eddy edge and total  
200 phytoplankton were included without smoothing terms (i.e., as linear terms). The resulting linear  
201 parameter estimates for each pathway were then examined. All statistical analyses were  
202 performed in R version 3.6.3 [36].

## 203 Results

### 204 Origin and physical characteristics of cyclonic and anticyclonic eddies

205 Two anticyclonic eddies originated in the Haida region, two were from the Sitka region, and two  
206 were from the Alaska Stream region (regions as described in [37]). Two eddies (from the Alaska  
207 Stream region and Sitka region) traveled the greatest longitudinal distance westward across the  
208 Gulf of Alaska within the Alaska Stream region (Fig 1). As expected, not all eddies had  
209 characteristic relative core temperatures during the periods of CPR sampling (S1 Table; Sun et  
210 al., 2019): two anticyclonic eddies contained cooler cores than their surrounding water and the  
211 cyclonic eddies, and one cyclonic eddy contained a much warmer core than the surrounding  
212 waters (S1 Fig). General eddy characteristics of each eddy are summarized across the entire  
213 lifespan (S1 Table) and within the sampling periods (Table 1). All eddies contained samples from  
214 the intensification (10 to 25% lifespan) and mature stages (25 to 80% lifespan) with the  
215 exception of eddies 3 and 6 that were sampled in the formation stage (0–10% lifespan) instead  
216 of intensification stage and eddy 4 that was sampled in the decay stage (80–100% lifespan)  
217 instead of the mature stage (stages as defined in [38]; Table 1). All eddies were formed during  
218 the spring or early summer, but one anticyclonic eddy from the Haida region was formed in the  
219 fall (S1 Table). Compared to cyclonic eddies, the anticyclonic eddies had faster mean rotation  
220 speeds (22 cm s<sup>-1</sup> vs. 9 cm s<sup>-1</sup>) and longer mean lifespans (2.2 years vs. 1 year; S1 Table).

221 **Table 1. Summarized eddy characteristics during sampling periods.**

| Rotation | Origin region | Eddy ID | Sample Year (N) | Month | Mean SST (°C) | Mean rotation speed | Mean radius (km) | Mean % of Age |
|----------|---------------|---------|-----------------|-------|---------------|---------------------|------------------|---------------|
|----------|---------------|---------|-----------------|-------|---------------|---------------------|------------------|---------------|

|              |           |           |           |            | (cm s <sup>-1</sup> ) |         |          |         |
|--------------|-----------|-----------|-----------|------------|-----------------------|---------|----------|---------|
| Anticyclonic | AK Stream | 2         | 2003 (41) | Aug        | 17.0 ± 1.2            | 24 ± 2  | 61 ± 3   | 19 ± 5  |
|              |           |           | 2004 (20) | Mar        | 9.8 ± 0.2             | 20 ± 1  | 73 ± 5   | 60 ± 3  |
|              |           | 3         | 2003 (17) | May        | 11.5 ± 0.0            | 32 ± 0  | 64 ± 0   | 3 ± 0   |
|              |           |           | 2005 (28) | Jun        | 13.7 ± 2.6            | 30 ± 10 | 59 ± 7   | 77 ± 5  |
|              | Haida     | 6         | 2011 (53) | Apr        | 10.0 ± 1.4            | 22 ± 4  | 43 ± 9   | 5 ± 4   |
|              |           |           | 2012 (29) | Apr        | 9.3 ± 1.4             | 11 ± 0  | 92 ± 14  | 66 ± 5  |
|              |           | 9         | 2012 (33) | Aug        | 15.1 ± 1.4            | 22 ± 2  | 51 ± 3   | 10 ± 6  |
|              |           |           | 2013 (95) | Jul        | 15.0 ± 3.0            | 14 ± 2  | 122 ± 10 | 53 ± 7  |
|              | Sitka     | 5         | 2007 (50) | Jul        | 15.3 ± 1.4            | 20 ± 4  | 99 ± 28  | 9 ± 7   |
|              |           |           | 2008 (11) | Sep        | 16.1 ± 0.0            | 11 ± 0  | 86 ± 1   | 79 ± 0  |
| 8            |           | 2011 (15) | Jun       | 14.1 ± 1.0 | 52 ± 3                | 70 ± 6  | 29 ± 1   |         |
|              |           | 2012 (18) | Oct       | 15.9 ± 0.0 | 35 ± 0                | 60 ± 0  | 63 ± 0   |         |
| Cyclonic     | Haida     | 1         | 2002 (29) | Dec        | 13.3 ± 0.1            | 10 ± 0  | 139 ± 2  | 13 ± 0  |
|              |           |           | 2003 (32) | May        | 12.1 ± 2.6            | 7 ± 1   | 89 ± 4   | 79 ± 18 |
|              |           | 4         | 2005 (19) | Aug        | 17.5 ± 0.3            | 8 ± 1   | 73 ± 7   | 20 ± 5  |
|              |           |           | 2006 (11) | Mar        | 8.4 ± 0.0             | 9 ± 0   | 124 ± 0  | 86 ± 0  |
|              | Sitka     | 7         | 2012 (59) | Aug        | 15.0 ± 1.7            | 7 ± 1   | 63 ± 23  | 16 ± 11 |
|              |           |           | 2013 (9)  | Apr        | 9.5 ± 0.0             | 7 ± 1   | 52 ± 3   | 65 ± 0  |

222 SST is from within the eddy. Means reported ± SD.

## 223 Relative abundance of plankton between taxonomic groups

224 Within both anticyclonic and cyclonic eddies, the diatoms had a significantly greater ranked  
 225 mean abundance than all other groups (P<0.001) with the exception of large copepods in  
 226 anticyclonic eddies, where there was no significant difference (P=0.33). After diatoms, large and  
 227 small copepods were greater in mean abundance than all other groups (P<0.001) except for  
 228 microzooplankton in cyclonic eddies only, where there was no significant difference (P=1.0).  
 229 Microzooplankton were also relatively high in abundance and were significantly more abundant  
 230 than all remaining groups in both eddy types (dinoflagellates, euphausiids, hyperiids, pteropods,  
 231 chaetognaths, and larvaceans; P<0.001). The remaining groups were relatively equivalent in  
 232 mean abundance with the exceptions that there were more hyperiids and fewer larvaceans than  
 233 dinoflagellates in the anticyclonic eddies (P<0.01) and more chaetognaths than dinoflagellates,

234 pteropods, larvaceans in the cyclonic eddies ( $P < 0.01$ ; S2 Fig). Due to the relatively poor CPR  
235 sampling of dinoflagellates, pteropods, and larvaceans, these taxonomic groups were excluded  
236 from further analysis.

### 237 [Phytoplankton and zooplankton structure across eddies](#)

238 Among the phytoplankton taxonomic groups, the abundance of diatoms was lower near the  
239 center of anticyclonic eddies and higher near the edge and the surrounding waters of  
240 anticyclonic eddies (Fig 3). Though marginally insignificant, a similar pattern with more  
241 uncertainty around the predicted abundance was detected in cyclonic eddies. There were no  
242 significant patterns in dinoflagellate abundance across either eddy type. Among the zooplankton  
243 taxonomic groups, euphausiids, small copepods, and microzooplankton exhibited inverse  
244 abundance relationships to diatoms within anticyclonic eddies, such that their abundances were  
245 highest at the center of the eddy compared to the edge and surrounding waters. Conversely,  
246 within cyclonic eddies, euphausiids, small copepods, and microzooplankton were less abundant  
247 near the center of the eddies and increased in abundance toward the eddy edge. Large  
248 copepods and hyperiids were highest in abundance mid-distance between the eddy center and  
249 edge (hereafter the “radial midpoint”). Where significant patterns were observed, peak  
250 zooplankton abundances were within or on the edge of all eddies except for the hyperiid group,  
251 which reached a maximum in the surrounding waters. There were no significant patterns in  
252 chaetognath abundances across either eddy type, thus further analysis of this group was not  
253 explored. Model residuals generally met assumptions of normality; however, the small copepod  
254 model residuals exhibited a positive skew.

255 **Fig 3. Patterns of plankton abundance across eddies vary by taxonomic group and eddy**  
256 **rotational type.** Smoothed relative abundances of taxonomic groups relative to partial effects of  
257 eddy edge by eddy type (anticyclonic in red, cyclonic in blue) from GAMs. The y-axes for each  
258 model (i.e., taxonomic group) are set to the same scale for comparison across eddy type, but the  
259 scale varies between models. Distance to the eddy edge on the x-axis is scaled for all models  
260 such that -1 indicates samples closest to the center of the eddy, 0 indicates eddy edge (dashed  
261 line), and 1 indicates samples closest to the cutoff point (164 km) outside of the eddy. Groups  
262 where neither eddy type showed a significant relationship are not shown (dinoflagellates,  
263 larvaceans, and chaetognaths). Hash marks at bottom of plot indicate the sampling locations for  
264 the entire model.

265 Within Haida eddies only, similar patterns in plankton abundances across eddy types were  
266 observed but with notable exceptions. Across anticyclonic eddies, there were no significant  
267 patterns in diatom abundance and across cyclonic eddies there were no significant patterns in  
268 large copepod abundance (Fig 4). Within anticyclonic eddies, microzooplankton abundance was  
269 lower within the eddy than the surrounding waters, similar to the pattern in cyclonic eddies.

270 **Fig 4. Patterns of plankton abundance across Haida eddies vary by taxonomic group and eddy**  
271 **rotational type.** Smoothed relative abundances from GAMs of taxonomic groups relative to  
272 partial effects of eddy edge by eddy type (anticyclonic in red, cyclonic in blue) within eddies  
273 originating from the Haida region only. The y-axes for each model (i.e., taxonomic group) are set  
274 to the same scale and center smoothed for comparison across eddy type, but the scale varies  
275 between models. Distance to the eddy edge on the x-axis is scaled for all models such that -1

276 indicates samples closest to the center of the eddy, 0 indicates eddy edge (dashed line), and 1  
277 indicates samples closest to the cutoff point (164 km) outside of the eddy. Hash marks at bottom  
278 of plot indicate the sampling locations for the entire model.

279 Additional spatial patterns in abundance across eddy types emerged when eddies were  
280 separated by life stage (see Fig 5 for following results). The anticyclonic eddy diatom pattern  
281 shifted from higher abundance near the eddy edge during the early stage to higher abundance at  
282 the radial midpoint during the mature stage. Among the zooplankton in anticyclonic eddies, the  
283 pattern of greater abundance at the eddy center disappeared for microzooplankton in all stages  
284 and for small copepods during the early stage. Small copepods were more abundant toward the  
285 eddy center in the mature and decay stages. Conversely, euphausiids were more abundant at  
286 the eddy center during the early stage but not the latter eddy life stages.

287 **Fig 5. Patterns of plankton abundance across eddies vary by taxonomic group, eddy rotational**  
288 **type, and eddy life span.** Smoothed relative abundances of taxonomic groups in the early stage,  
289 the mature stage, and the mature stage combined with the decay stage of the eddy lifespan  
290 relative to partial effects of eddy edge by eddy type (anticyclonic in red, cyclonic in blue) from  
291 GAMs. The y-axes within each model (i.e., taxonomic group) are set to the same scale for  
292 comparison across eddy type, but the scale varies between models and between life stages.  
293 Distance to the eddy edge on the x-axis is scaled for all models such that -1 indicates samples  
294 closest to the center of the eddy, 0 indicates eddy edge (dashed line), and 1 indicates samples  
295 closest to 164 km cutoff point outside of the eddy. Hash marks at bottom of plot indicate the  
296 sampling locations for the entire model.

297 Within cyclonic eddies, the marginal diatom abundance signal was penalized out of the model  
298 when split by stage, with the exception of the ‘mature + decay’ stage. When the mature stage  
299 included the decay phase the marginal pattern of peak diatom abundance near the eddy  
300 periphery emerged. Among the zooplankton in cyclonic eddies, abundance patterns during the  
301 early stage were similar to the full model (all stages), with the exception of large copepods.  
302 There was no significant pattern in large copepod abundance during the early stage and instead  
303 a pattern appeared in the mature stage but with a linear increase toward the cyclonic eddy  
304 center. Small copepods were less abundant at the eddy edge during the latter eddy life stages,  
305 but still higher in abundance within the eddies than surrounding waters. Their abundance near  
306 the eddy center, however, was still lower than in the anticyclonic eddies. Hyperiid exhibited no  
307 patterns in abundance across cyclonic eddies in the latter life stages. Euphausiids became more  
308 abundant in surrounding waters during the ‘mature + decay’ stage.

### 309 [Impact of phytoplankton on zooplankton](#)

310 Full GAMs by taxonomic group indicated that, with the exception of euphausiids, each  
311 zooplankton taxonomic group had linear or curvilinear relationships with total phytoplankton  
312 abundance (S4 Fig). A positive linear relationship was detected for small copepods (and total  
313 copepods). All relationships became more variable with exponentially larger phytoplankton  
314 counts and microzooplankton increased in abundance until this point, when they then slightly  
315 decreased (S4 Fig). When models were parsed by rotation type for mediation, total copepod  
316 abundance initially decreased with increasing total plankton then increased when total  
317 phytoplankton reached counts of approximately 100,000 cells per sample in anticyclonic eddies



318 (Fig 6). In cyclonic eddies, total copepod abundance asymptotically increased with total  
319 phytoplankton abundance (Fig 6). Within anticyclonic eddies, the bootstrapped mediation  
320 models did not show any significant effects, likely due to inconsistent mediation [39], where the  
321 mediation pathway suppresses the direct pathway due to opposing signs (or curvilinearity, in this  
322 case). The stepwise approach revealed that in the anticyclonic eddies, the pathways a and c' (Fig  
323 6a) were opposing in sign (estimates=-0.32 and 0.41, respectively), and that although the effect  
324 of total phytoplankton on total copepods (pathway b; Fig 6b) was significant ( $P < 0.001$ ), the effect  
325 size was negligible (estimate=0.00) and no mediation occurred. Within cyclonic eddies, the  
326 bootstrapped mediation models indicated no mediation (averaged:  $P = 0.23$ ) with only direct and  
327 total effects of phytoplankton on zooplankton (averaged direct estimate: -189, 95% CI [-43, -  
328 275],  $P = 0.03$ ; total estimate=-219, 95% CI [-71, -310],  $P = 0.01$ ; respectively).

329 **Fig 6. Distance to eddy edge directly affects zooplankton abundance.** Anticyclonic (top) and  
330 cyclonic (bottom) eddy GAM estimates of relative abundance of total phytoplankton predicted  
331 by distance to eddy edge (pathway a) and relative abundance of total copepods predicted by  
332 total phytoplankton (pathway b) and distance to eddy edge (pathway c'). Red line indicates  
333 mediation does not occur. Additional covariates (hour, day of year, and random effects of eddy  
334 ID and year) are not shown. Mediation pathways are represented by a and b and the direct  
335 pathway is represented by c'. In the bootstrapped mediation, the mediator model tests pathway  
336 a and the outcome model simultaneously tests the effects c' while controlling for the effect of b.

## 337 Discussion

338 In this study we gain a more complete and consistent description of how eddy dynamics  
339 associated with rotational type, origin, and life span affect the structure of plankton  
340 communities in the pelagic Gulf of Alaska using high resolution, *in situ* CPR data inside and  
341 outside several eddies. Phytoplankton abundances were highest near eddy edges for both eddy  
342 rotational types (Figs 1 and 6), consistent with satellite observations [38], whereas zooplankton  
343 abundance was higher near the edge of cyclonic eddies but higher near the center of  
344 anticyclonic eddies. These overall plankton community patterns were observed within eddies  
345 originating from the same region (i.e., the Haida region) for small copepods, hyperiids, and  
346 euphausiids, indicating that differences for these groups were largely due to rotation type (and  
347 possibly other eddy dynamics), not origin region. However, for microzooplankton and large  
348 copepods, origin region may have been important. Moreover, eddy age was a determining factor  
349 in plankton abundance within eddies, with some abundance patterns only found in the early  
350 stage (e.g., hyperiids) or only in the mature stage (e.g., large copepods), and with some  
351 abundances shifting from the center to the edge of eddies with time (e.g., euphausiids). Finally,  
352 when explored within the copepod group, the relationship between the distance to the eddy  
353 edge and abundance was not mediated by phytoplankton abundance.

### 354 Various eddy dynamics determine plankton composition and organization

355 In our study, varied contributions of complex eddy hydrodynamics and associated  
356 biogeochemistry could explain the similar phytoplankton abundance patterns observed in both

357 eddy types. Typically, nutrients (e.g., iron, which may be limiting offshore) and nutrient-  
358 dependent phytoplankton are vertically pumped in opposing patterns for each rotational type  
359 [13]. During formation, anticyclonic eddy pumping forces vertical upwelling on the outer edges  
360 of the eddy and convergence and downwelling at the center; these characteristics are consistent  
361 with warm, positive sea-level anomalies, and negative chlorophyll anomalies in the eddy core  
362 [40–42]. Opposite dynamics and patterns occur during cyclonic eddy formation [9,41,42]. The  
363 North Pacific, however, is known to have anticyclonic cold core and cyclonic warm core eddies  
364 [43], in addition to chlorophyll rings and high biomass around the peripheries of both eddy types  
365 [14,38]. Argo floats have been used to identify that radial displacement (i.e., displacement along  
366 the radius from the eddy center) and edge convergence occurs in anticyclonic eddies even when  
367 wind-driven eddy-induced Ekman pumping that causes inverse upwelling patterns to those at  
368 eddy intensification could enhance chlorophyll at the eddy center [8,10,44]. Thus, in our study,  
369 the peripheral signal of diatoms observed in both eddy rotational types may be attributable to  
370 strong vorticity of the anticyclonic eddies. Cyclonic eddies are much slower and therefore less  
371 likely to be affected by weaker Ekman pumping than internal eddy dynamics; however, Ekman  
372 pumping could still cause downwelling at the eddy center and divergence and upwelling at the  
373 eddy edge near the surface [45], consistent with our observation.

#### 374 Eddy origin and life stage influences on phytoplankton

375 Further examination of eddies by their origin region and life stage illuminated the importance of  
376 these respective influences on the composition and organization of plankton communities. For  
377 example, early-stage anticyclonic eddies in the Haida region showed no pattern in diatom

378 abundance across eddy edges in contrast to our model with all eddies combined; suggesting that  
379 the pattern of higher edge abundance in the latter model may be influenced by eddy formation  
380 in more northerly latitudes. Moreover, long-lived eddies (3 and 8), sampled while propagating in  
381 the Alaska Stream (Fig 1), had faster rotational speeds relative to other eddies (S1 Table); thus,  
382 both Ekman pumping and the radial displacement of entrapped diatoms could account for the  
383 observed spatial pattern. Diatoms are more abundant in the northern Gulf of Alaska and along  
384 the Alaska Peninsula [46], which could support diatoms near the periphery through eddy stirring  
385 throughout the anticyclonic eddy lifespan. Indeed, the mature stage anticyclonic eddies exhibit  
386 high abundance near the radial midpoint, consistent with satellite observations of chlorophyll  
387 anomaly dipoles that can be induced by the horizontal stirring of water masses [4,11].

388 In contrast, diatoms within cyclonic eddies from the Haida region showed peaks in abundance  
389 near the eddy edge. This pattern disappeared when the eddy data were parsed into early and  
390 mature stages, but when the decay phase was included (i.e., mature and decay phase  
391 combined), peak diatom abundance unexpectedly appeared near the eddy edge, but was not  
392 significant. This diatom structuring across eddy life stages indicates that a combination of  
393 regional influence, decay phase eddy pumping, and Ekman pumping of nutrients at the cyclonic  
394 eddy periphery supported diatom abundance. The proliferation of diatoms in the cyclonic Haida  
395 eddies may be due to greater nutrients in the water mass at formation, as eddy 4 formed  
396 between Haida Gwaii and the coast of British Columbia. The lack of diatom patterns in  
397 anticyclonic Haida eddies may have been confounded by an iron deposition experiment in July  
398 2012 when 100 tons of iron sulfite were dumped into the ocean 300 km off the west coast of  
399 Haida Gwaii; this action resulted in higher-than-average zooplankton abundance that could have

400 increased grazing pressure on diatoms [47]. In summary, the overall influence of eddies on  
401 phytoplankton distribution within and across eddies is best understood when accounting for  
402 regional water mass characteristics and eddy life stage.

### 403 Eddy origin and life stage influences on zooplankton

404 Likewise, among the zooplankton, examination of abundance variation by origin region and eddy  
405 life stage was revealing. Contrary to our hypothesis that early life stage dynamics would have a  
406 greater influence on community organization, in anticyclonic eddies, only euphausiids exhibited  
407 peak abundances near the eddy center in the early life stages with their abundance becoming  
408 lower at the center relative to the eddy edge in later eddy life stages. Early-staged anticyclonic  
409 eddies are known to form with warmer, more oligotrophic waters entrapped at their cores [13].  
410 Consistent with the entrapment of less productive waters, there was no pattern of abundance in  
411 the other zooplankton taxonomic groups in the early eddy life stage. Small copepods became  
412 more abundant near the center of mature and decay stage anticyclonic eddies when  
413 ageostrophic perturbations and wind-driven Ekman pumping could lead to upwelling at the  
414 anticyclonic eddy centers [6].

415 As expected, the cyclonic eddies in this study became less “productive” as they aged and  
416 traversed the Gulf of Alaska relative to anticyclonic eddies. Slower-rotating cyclonic eddies  
417 should also be expected to have weaker upwelling of nutrients and thus become depleted more  
418 rapidly, and with their shorter overall lifespans the regeneration of zooplankton communities is  
419 less likely. Indeed, the taxonomic group with more mobility (i.e., euphausiids) were higher in  
420 abundance outside of the cyclonic eddies during the decay stage. The relatively greater

421 abundance of large copepods sustained in the cyclonic eddy core relative to surrounding waters  
422 in later stages (a pattern that contrasted with the other groups) may be more reflective of a lack  
423 of offshore large copepods, thus highlighting the potential importance of cyclonic eddies in  
424 horizontally transporting large copepod species in the Gulf of Alaska.

## 425 Biological structuring of zooplankton

426 In addition to the effects of hydrodynamics, zooplankton structuring across eddies could have  
427 been influenced by their biological and life history traits. For example, where smaller  
428 zooplankton may be more susceptible to physical forcing, such as radial displacement, larger  
429 zooplankton can swim vertically to remain stable in the water column [48]. Diel vertical  
430 migration is thought to allow some species to avoid mixing dynamics that force the horizontal  
431 export or “leaking” of zooplankton from eddies [49]. Large copepods in this study, with the  
432 exception of those within mature cyclonic eddies, were uniform in structure across eddies similar  
433 to those sampled in [49], which was attributed to seasonal breeding cycles, during which spawn  
434 enter the eddy from below and remain beneath the mixed layer until vertical migration in the  
435 late summer. Correspondingly, most of our samples were from late spring/early summer.  
436 Hyperiid will also remain below the mixed layer during both day and night, feeding on copepods  
437 and other zooplankton [50], which could account for a similar uniform structure across later  
438 eddy life stages with some exceptions that could be attributed to differences in the movement  
439 patterns of gelatinous zooplankton hosts used by hyperiids [51]. Notably, small copepods in  
440 anticyclonic eddies persisted at the eddy core relative to the eddy edge in later life stages when  
441 other zooplankton like large copepods and hyperiids exhibited declines in abundance. Small

442 copepods may have a preference or higher tolerance for warmer waters (i.e., warm core  
443 anticyclonic eddies), as they are more abundant in warmer temperatures compared to large  
444 copepods [52] and are known to concentrate at shallower depths in the mixed layer [53]. Small  
445 copepods also have shorter reproductive cycles, thus recruitment within longer-lived eddies and  
446 subsequent increases in small copepod abundance relative to large copepod abundance is more  
447 likely. When eddy pumping reverses in the later eddy life stages, small copepods may remain at  
448 the eddy center where there is greater upwelling rather than converging at the eddy edge due to  
449 vertical migration enabling them to escape radial displacement and predation by the larger  
450 carnivorous zooplankton.

451 The effect of grazers on controlling phytoplankton abundance, or conversely, the bottom-up  
452 effect of phytoplankton abundance on the location of grazers, complicates the assessment of  
453 physical structuring of plankton biological communities. To address this issue, we examined  
454 relationships between copepods (small and large) and phytoplankton (dinoflagellates and  
455 diatoms). We found that copepod distribution across eddies did not depend on diatom  
456 abundance. Some copepods may feed on other undetected phytoplankton species (i.e., those  
457 without hard shells or too small to be adequately retained by the CPR) and/or copepods may  
458 also consume microzooplankton at high rates (e.g., [54]). Other consumers of diatoms and/or  
459 copepods could potentially confound simple mediation pathways, especially considering that  
460 microzooplankton are also heavy grazers of diatoms in the Gulf of Alaska [55]. Alternatively, the  
461 physical forcing of the eddy hydrodynamics such as radial displacement and convergence that  
462 structures phytoplankton across an eddy may similarly force an overlap of zooplankton that is  
463 advantageous for the grazers. Depending on the life stage of the eddy, the overlap may also be

464 determined by the spatial distributions of the organisms during entrainment by the eddy, which  
465 seems likely given the difference in pattern between phytoplankton and zooplankton abundance  
466 in the early stage. In support of a primary influence of eddy mechanics on distributions, Schmid  
467 et al. [24] found passive spatial structuring of larval fishes within an eddy in relation to their  
468 *Oithona* spp. copepod prey that they attributed to eddy structural mechanics. Eddy mechanics  
469 thus appear to play a key role in directly structuring low-motility zooplankton communities,  
470 which should indirectly structure more mobile, higher-level consumers such as krill, fish,  
471 seabirds, and marine mammals.

## 472 Conclusion

473 Although we used a large number of CPR samples, there were few eddies available for  
474 investigating plankton communities both within and outside eddy margins. Fewer eddies lead to  
475 a wider margin of uncertainty within models for cyclonic eddies that were not as abundant in our  
476 study (n=3, Table 1). There is also greater uncertainty in the relative abundances of plankton  
477 near the center of cyclonic eddies as the CPR sampled farther from those eddy centers  
478 compared to anticyclonic eddies (Fig 2), but the patterns across both eddy types are still clear.  
479 We also note that the influence of eddies in shaping marine biological communities extends  
480 below the depth at which the CPR sampled (e.g.,[56]). Furthermore, it is known that other  
481 characteristics, such as rotational speed and specific eddy age, may influence associated  
482 planktonic communities [49,57], but we removed characteristics that exhibited high collinearity  
483 with other fixed variables in our model. Typically, from eddy formation and intensification to  
484 maturation and eventual decay, there is a complex spatiotemporal evolution of chlorophyll



485 anomalies associated with eddies, relating to shifts in internal eddy pumping and peripheral  
486 stirring with surrounding waters [11]. However, day of year captures some of the variability  
487 associated with eddy aging, as well as temperature effects that differ with season. Despite these  
488 potential caveats, we were able to quantify the influence of major eddy characteristics on  
489 plankton communities by separating the data into early, mature, and decay life stages.

490 Cyclonic and anticyclonic eddies play important roles in directly structuring phytoplankton and  
491 zooplankton communities in the Gulf of Alaska, with their relative influences depending on  
492 formation region, eddy trajectory (e.g., where mixing occurs), and pumping dynamics that shift  
493 across the eddy lifespan. The mechanisms that structure plankton communities are undoubtedly  
494 multifaceted and include horizontal stirring, eddy pumping, and eddy-induced Ekman pumping.  
495 These processes distribute plankton in varied ways. Long-lived anticyclonic eddies with high  
496 rotational vorticity were important for stirring nutrients and sustaining productive phytoplankton  
497 and small copepod communities across the northern continental margin. This finding is in  
498 contrast to studies that show a significant reduction in nutrients in eddies after the first 4  
499 months [17,58], but similar to other studies demonstrating the importance of anticyclonic eddies  
500 to marine ecosystems in other ocean basins [13,46,59,60]. As the cyclonic eddies decayed, they  
501 became relatively less productive than anticyclonic eddies for small copepods, but continued to  
502 be regionally important for the offshore transport of large copepods. Anticyclonic and cyclonic  
503 eddies provide differing ecosystem structuring to the Gulf of Alaska, shaping marine  
504 communities regionally based on the organisms that are encapsulated, the enhancement of  
505 production through eddy dynamics, and the stirring of plankton into surrounding waters.

## 506 Datasets

507 The Mesoscale Eddy Trajectory Atlas products were produced by SSALTO/DUACS and distributed  
508 by AVISO+ (<https://www.aviso.altimetry.fr/>) with support from CNES, in collaboration with  
509 Oregon State University with support from NASA. CMC SSTs version 2.0 are available from the  
510 JPL PO.DAAC dataset identification CMC0.2deg-CMC-L4-GLOB-v2.0.

## 511 Acknowledgements

512 We thank Dr. Brian Hoover for thoughtful discussions during data analysis and for comment on  
513 the first draft of this manuscript. We also thank the volunteer vessels and crews that towed the  
514 CPR devices and the members of the CPR program that processed the taxonomic data used in  
515 our study.

## 516 References

- 517 1. Crawford WR, Whitney FA. Mesoscale eddy swirl with data in Gulf of Alaska. *Eos Trans Am*  
518 *Geophys Union*. 1999;80: 365. doi:10.1029/EO080i033p00365-01
- 519 2. Ladd C. Interannual variability of the Gulf of Alaska eddy field. *Geophys Res Lett*. 2007;34:  
520 L11605. doi:10.1029/2007GL029478
- 521 3. Zhang Z, Wang W, Qiu B. Oceanic mass transport by mesoscale eddies. *Science*. 2014;345:  
522 322–324. doi:10.1126/science.1252418
- 523 4. Batten SD, Crawford WR. The influence of coastal origin eddies on oceanic plankton  
524 distributions in the eastern Gulf of Alaska. *Deep Sea Res Part II Top Stud Oceanogr*.  
525 2005;52: 991–1009. doi:10.1016/j.dsr2.2005.02.009
- 526 5. Crawford WR, Brickley PJ, Peterson TD, Thomas AC. Impact of Haida Eddies on chlorophyll  
527 distribution in the Eastern Gulf of Alaska. *Deep Sea Res Part II Top Stud Oceanogr*. 2005;52:  
528 975–989. doi:10.1016/j.dsr2.2005.02.011

- 529 6. Martin AP, Richards KJ. Mechanisms for vertical nutrient transport within a North Atlantic  
530 mesoscale eddy. *Deep Sea Res Part II Top Stud Oceanogr.* 2001;48: 757–773.  
531 doi:10.1016/S0967-0645(00)00096-5
- 532 7. Klein P, Lapeyre G. The Oceanic Vertical Pump Induced by Mesoscale and Submesoscale  
533 Turbulence. *Annu Rev Mar Sci.* 2009;1: 351–375.  
534 doi:10.1146/annurev.marine.010908.163704
- 535 8. Zhang W-Z, Xue H, Chai F, Ni Q. Dynamical processes within an anticyclonic eddy revealed  
536 from Argo floats: Dynamical processes in anticyclonic eddy. *Geophys Res Lett.* 2015;42:  
537 2342–2350. doi:10.1002/2015GL063120
- 538 9. Falkowski PG, Ziemann D, Kolber Z, Bienfang PK. Role of eddy pumping in enhancing  
539 primary production in the ocean. *Nature.* 1991;352: 55–58. doi:10.1038/352055a0
- 540 10. Gaube P, Chelton DB, Samelson RM, Schlax MG, O’Neill LW. Satellite Observations of  
541 Mesoscale Eddy-Induced Ekman Pumping. *J Phys Oceanogr.* 2015;45: 104–132.  
542 doi:10.1175/JPO-D-14-0032.1
- 543 11. Huang J, Xu F, Zhou K, Xiu P, Lin Y. Temporal evolution of near-surface chlorophyll over  
544 cyclonic eddy lifecycles in the southeastern Pacific: TEMPORAL EVOLUTION OF CHL IN  
545 EDDIES. *J Geophys Res Oceans.* 2017;122: 6165–6179. doi:10.1002/2017JC012915
- 546 12. Franks P, Wroblewski J, Flierl G. Prediction of Phytoplankton Growth in Response to the  
547 Frictional Decay of a Warm-Core Ring. *J Geophys Res.* 1986;91: 7603–7610.  
548 doi:10.1029/JC091iC06p07603
- 549 13. McGillicuddy DJ. Mechanisms of Physical-Biological-Biogeochemical Interaction at the  
550 Oceanic Mesoscale. *Annu Rev Mar Sci.* 2016;8: 125–159. doi:10.1146/annurev-marine-  
551 010814-015606
- 552 14. Godø OR, Samuelsen A, Macaulay GJ, Patel R, Hjøllø SS, Horne J, et al. Mesoscale Eddies Are  
553 Oases for Higher Trophic Marine Life. Ropert-Coudert Y, editor. *PLoS ONE.* 2012;7: e30161.  
554 doi:10.1371/journal.pone.0030161
- 555 15. Boyd PW, Law CS, Wong CS, Nojiri Y, Tsuda A, Levasseur M, et al. The decline and fate of an  
556 iron-induced subarctic phytoplankton bloom. *Nature.* 2004;428: 549–553.  
557 doi:10.1038/nature02437
- 558 16. Whitney F, Robert M. Structure of Haida Eddies and Their Transport of Nutrient from  
559 Coastal Margins into the NE Pacific Ocean. : 9.
- 560 17. Johnson KW, Miller LA, Sutherland NE, Wong CS. Iron transport by mesoscale Haida eddies  
561 in the Gulf of Alaska. *Deep Sea Res Part II Top Stud Oceanogr.* 2005;52: 933–953.  
562 doi:10.1016/j.dsr2.2004.08.017

- 563 18. Atwood E, Duffy-Anderson JT, Horne JK, Ladd C. Influence of mesoscale eddies on  
564 ichthyoplankton assemblages in the Gulf of Alaska: Mesoscale eddies and ichthyoplankton  
565 assemblages. *Fish Oceanogr.* 2010;19: 493–507. doi:10.1111/j.1365-2419.2010.00559.x
- 566 19. Ream RR, Sterling JT, Loughlin TR. Oceanographic features related to northern fur seal  
567 migratory movements. *Deep Sea Res Part II Top Stud Oceanogr.* 2005;52: 823–843.  
568 doi:10.1016/j.dsr2.2004.12.021
- 569 20. Mackas DL, Galbraith MD. Zooplankton Distribution and Dynamics in a North Pacific Eddy of  
570 Coastal Origin: I. Transport and Loss of Continental Margin Species. *J Oceanogr.* 2002;58:  
571 725–738.
- 572 21. Mizobata K, Saitoh SI, Shiimoto A, Miyamura T, Shiga N, Imai K, et al. Bering Sea cyclonic  
573 and anticyclonic eddies observed during summer 2000 and 2001. *Prog Oceanogr.* 2002;55:  
574 65–75. doi:10.1016/S0079-6611(02)00070-8
- 575 22. Brown SL, Landry MR, Selph KE, Jin Yang E, Rii YM, Bidigare RR. Diatoms in the desert:  
576 Plankton community response to a mesoscale eddy in the subtropical North Pacific. *Deep  
577 Sea Res Part II Top Stud Oceanogr.* 2008;55: 1321–1333. doi:10.1016/j.dsr2.2008.02.012
- 578 23. Fernández E, Álvarez F, Anadón R, Barquero S, Bode A, García A, et al. The spatial  
579 distribution of plankton communities in a Slope Water anticyclonic Oceanic eddy  
580 (SWODDY) in the southern Bay of Biscay. *J Mar Biol Assoc U K.* 2004;84: 501–517.  
581 doi:10.1017/S0025315404009518h
- 582 24. Schmid MS, Cowen RK, Robinson K, Luo JY, Briseño-Avena C, Sponaugle S. Prey and  
583 predator overlap at the edge of a mesoscale eddy: fine-scale, in-situ distributions to inform  
584 our understanding of oceanographic processes. *Sci Rep.* 2020;10: 921. doi:10.1038/s41598-  
585 020-57879-x
- 586 25. Batten SD, Clark R, Flinkman J, Hays G, John E, John AWG, et al. CPR sampling: the technical  
587 background, materials and methods, consistency and comparability. *Prog Oceanogr.*  
588 2003;58: 193–215. doi:10.1016/j.pocean.2003.08.004
- 589 26. Beaugrand G, B FI, A JAL. An overview of statistical methods applied to CPR data. *Prog  
590 Oceanogr.* 2003;58.
- 591 27. Bivand R, Rundel C, Pebesma E, Stuetz R, Hufthammer KO, Giraudoux P, et al. rgeos:  
592 Interface to Geometry Engine - Open Source ('GEOS'). 2021. Available: [https://CRAN.R-  
593 project.org/package=rgeos](https://CRAN.R-project.org/package=rgeos)
- 594 28. Harris CR, Millman KJ, van der Walt SJ, Gommers R, Virtanen P, Cournapeau D, et al. Array  
595 programming with NumPy. *Nature.* 2020;585: 357–362. doi:10.1038/s41586-020-2649-2
- 596 29. Hoyer S, Hamman J, Roos M, keewis, Cherian D, Fitzgerald C, et al. pydata/xarray: v0.18.2.  
597 Zenodo; 2021. doi:10.5281/zenodo.4774304

- 598 30. Reback J, McKinney W, jbrockmendel, Bossche JV den, Augspurger T, Cloud P, et al. pandas-  
599 dev/pandas: Pandas 1.0.3. Zenodo; 2020. doi:10.5281/zenodo.3715232
- 600 31. Brasnett B. The impact of satellite retrievals in a global sea-surface-temperature analysis. Q  
601 J R Meteorol Soc. 2008;134: 1745–1760. doi:10.1002/qj.319
- 602 32. Signorell A, Aho K, Alfons A, Anderegg N, Aragon T, Arachchige C, et al. DescTools: Tools for  
603 Descriptive Statistics. 2021. Available: <https://CRAN.R-project.org/package=DescTools>
- 604 33. Wood S. mgcv: Mixed GAM Computation Vehicle with Automatic Smoothness Estimation.  
605 2021. Available: <https://CRAN.R-project.org/package=mgcv>
- 606 34. Tingley D, Yamamoto T, Hirose K, Keele L, Imai K, Trinh M, et al. mediation: Causal  
607 Mediation Analysis. 2019. Available: <https://CRAN.R-project.org/package=mediation>
- 608 35. Baron RM, Kenny DA. The moderator-mediator variable distinction in social psychological  
609 research: Conceptual, strategic, and statistical considerations. 1986.
- 610 36. R: The R Project for Statistical Computing. [cited 26 Sep 2021]. Available: [https://www.r-](https://www.r-project.org/)  
611 [project.org/](https://www.r-project.org/)
- 612 37. Henson SA, Thomas AC. A census of oceanic anticyclonic eddies in the Gulf of Alaska. Deep  
613 Sea Res Part Oceanogr Res Pap. 2008;55: 163–176. doi:10.1016/j.dsr.2007.11.005
- 614 38. Xu G, Dong C, Liu Y, Gaube P, Yang J. Chlorophyll Rings around Ocean Eddies in the North  
615 Pacific. Sci Rep. 2019;9: 2056. doi:10.1038/s41598-018-38457-8
- 616 39. MacKinnon DP, Fairchild AJ, Fritz MS. Mediation Analysis. Annu Rev Psychol. 2007;58: 593–  
617 614. doi:10.1146/annurev.psych.58.110405.085542
- 618 40. Gaube P, McGillicuddy DJ, Chelton DB, Behrenfeld MJ, Strutton PG. Regional variations in  
619 the influence of mesoscale eddies on near-surface chlorophyll. J Geophys Res Oceans.  
620 2014;119: 8195–8220. doi:10.1002/2014JC010111
- 621 41. Siegel DA, Court DB, Menzies DW, Peterson P, Maritorena S, Nelson NB. Satellite and in situ  
622 observations of the bio-optical signatures of two mesoscale eddies in the Sargasso Sea.  
623 Deep Sea Res Part II Top Stud Oceanogr. 2008;55: 1218–1230.  
624 doi:10.1016/j.dsr2.2008.01.012
- 625 42. Wang Y, Zhang H-R, Chai F, Yuan Y. Impact of mesoscale eddies on chlorophyll variability off  
626 the coast of Chile. Dias JM, editor. PLOS ONE. 2018;13: e0203598.  
627 doi:10.1371/journal.pone.0203598
- 628 43. Sun W, Dong C, Tan W, He Y. Statistical Characteristics of Cyclonic Warm-Core Eddies and  
629 Anticyclonic Cold-Core Eddies in the North Pacific Based on Remote Sensing Data. Remote  
630 Sens. 2019;11: 208. doi:10.3390/rs11020208

- 631 44. Rohr T, Harrison C, Long MC, Gaube P, Doney SC. The Simulated Biological Response to  
632 Southern Ocean Eddies via Biological Rate Modification and Physical Transport. *Glob*  
633 *Biogeochem Cycles*. 2020;34. doi:10.1029/2019GB006385
- 634 45. McGillicuddy DJ, Anderson LA, Bates NR, Bibby T, Buesseler KO, Carlson CA, et al.  
635 Eddy/Wind Interactions Stimulate Extraordinary Mid-Ocean Plankton Blooms. *Science*.  
636 2007;316: 1021–1026. doi:10.1126/science.1136256
- 637 46. Brickley P, Thomas A. Satellite-measured seasonal and inter-annual chlorophyll variability in  
638 the Northeast Pacific and Coastal Gulf of Alaska. *Deep Sea Res Part II Top Stud Oceanogr*.  
639 2004;51: 229–245. doi:10.1016/j.dsr2.2003.06.003
- 640 47. Batten S, Gower J. Did the iron fertilization near Haida Gwaii in 2012 affect the pelagic  
641 lower trophic level ecosystem. 2014. doi:10.1093/PLANKT/FBU049
- 642 48. Genin A, Jaffe JS, Reef R, Richter C, Franks PJS. Swimming Against the Flow: A Mechanism of  
643 Zooplankton Aggregation. *Science*. 2005;308: 860–862. doi:10.1126/science.1107834
- 644 49. Mackas DL, Tsurumi M, Galbraith MD, Yelland DR. Zooplankton distribution and dynamics in  
645 a North Pacific Eddy of coastal origin: II. Mechanisms of eddy colonization by and retention  
646 of offshore species. *Deep Sea Res Part II Top Stud Oceanogr*. 2005;52: 1011–1035.  
647 doi:10.1016/j.dsr2.2005.02.008
- 648 50. Haro-Garay MJ. Diet and Functional Morphology of the Mandible of Two Planktonic  
649 Amphipods from the Strait of Georgia, British Columbia, *Parathemisto pacifica* (Stebbing,  
650 1888) and *Cyphocaris challengerii* (Stebbing, 1888). *Crustaceana*. 2003;76: 1291–1312.
- 651 51. Lavaniegos BE. Hyperiid amphipods from the Gulf of Ulloa and offshore region, Baja  
652 California: The possible role of the gelatinous zooplankton as a transport vector into the  
653 coastal shelf waters. Riascos JM, editor. *PLOS ONE*. 2020;15: e0233071.  
654 doi:10.1371/journal.pone.0233071
- 655 52. San Martin E, Harris RP, Irigoien X. Latitudinal variation in plankton size spectra in the  
656 Atlantic Ocean. *Deep Sea Res Part II Top Stud Oceanogr*. 2006;53: 1560–1572.  
657 doi:10.1016/j.dsr2.2006.05.006
- 658 53. Balazy K, Trudnowska E, Wichorowski M, Błachowiak-Samołyk K. Large versus small  
659 zooplankton in relation to temperature in the Arctic shelf region. *Polar Res*. 2018;37:  
660 1427409. doi:10.1080/17518369.2018.1427409
- 661 54. Fessenden L, Cowles T. Copepod predation on phagotrophic ciliates in Oregon coastal  
662 waters. *Mar Ecol Prog Ser*. 1994;107: 103–111. doi:10.3354/meps107103
- 663 55. Strom SL, Macri EL, Olson MB. Microzooplankton grazing in the coastal Gulf of Alaska:  
664 Variations in top-down control of phytoplankton. *Limnol Oceanogr*. 2007;52: 1480–1494.  
665 doi:10.4319/lo.2007.52.4.1480

- 666 56. Thompson PA, Pesant S, Waite AM. Contrasting the vertical differences in the  
667 phytoplankton biology of a dipole pair of eddies in the south-eastern Indian Ocean. *Deep*  
668 *Sea Res Part II Top Stud Oceanogr.* 2007;54: 1003–1028. doi:10.1016/j.dsr2.2006.12.009
- 669 57. Chelton DB, Gaube P, Schlax MG, Early JJ, Samelson RM. The Influence of Nonlinear  
670 Mesoscale Eddies on Near-Surface Oceanic Chlorophyll. *Science.* 2011;334: 328–332.  
671 doi:10.1126/science.1208897
- 672 58. Peterson TD, Whitney FA, Harrison PJ. Macronutrient dynamics in an anticyclonic mesoscale  
673 eddy in the Gulf of Alaska. *Deep Sea Res Part II Top Stud Oceanogr.* 2005;52: 909–932.  
674 doi:10.1016/j.dsr2.2005.02.004
- 675 59. Gaube P, Chelton DB, Strutton PG, Behrenfeld MJ. Satellite observations of chlorophyll,  
676 phytoplankton biomass, and Ekman pumping in nonlinear mesoscale eddies:  
677 PHYTOPLANKTON AND EDDY-EKMAN PUMPING. *J Geophys Res Oceans.* 2013;118: 6349–  
678 6370. doi:10.1002/2013JC009027
- 679 60. Dufois F, Hardman-Mountford NJ, Greenwood J, Richardson AJ, Feng M, Matear RJ.  
680 Anticyclonic eddies are more productive than cyclonic eddies in subtropical gyres because  
681 of winter mixing. *Sci Adv.* 2016;2: e1600282. doi:10.1126/sciadv.1600282

## 682 [Supporting information captions](#)

683 **Supplemental Fig 1. Relative smoothed SST across each sampled eddy.** The estimated SST on the  
684 y-axis is from a generalized additive model with a centered factorial smoother (by ‘Eddy ID’) and  
685 a random effect of year. Anticyclonic eddies are in red, cyclonic in blue. Distance to eddy edge is  
686 scaled such -1 is the center, zero is the eddy edge, and 1 is the 150 km outside the eddy.

687 **Supplemental Fig 2. Relative abundance of taxonomic groups in each eddy rotational type.**  
688 Median log density and boxed interquartile range (IQR) for each taxonomic group for  
689 anticyclonic eddies (top) and cyclonic eddies (bottom). Whiskers indicate 1.5 x IQR and outliers  
690 are depicted as closed circles. Box plots for each taxonomic group are in descending order based  
691 on mean log density.

692 **Supplemental Fig 3. Full model partial plots and residual plots for each taxonomic group.** (A) Full  
693 generalized additive model fitted plots with all covariate partial effects. The y-axis shows relative  
694 log abundance scaled the same for each plot and is center smoothed – estimated degrees of  
695 freedom are in parentheses. (B) Plots for visual inspection of model assumptions: (top left)  
696 quantile-quantile plot of deviance residuals, (top right) histogram of residuals, (bottom left)  
697 residuals vs. linear predictor, (bottom right) response vs. fitted value.

698 **Supplemental Table 1. Summarized characteristics across eddy lifespan.**

699 **Supplemental Table 2. Generalized additive model results for each taxonomic group.**



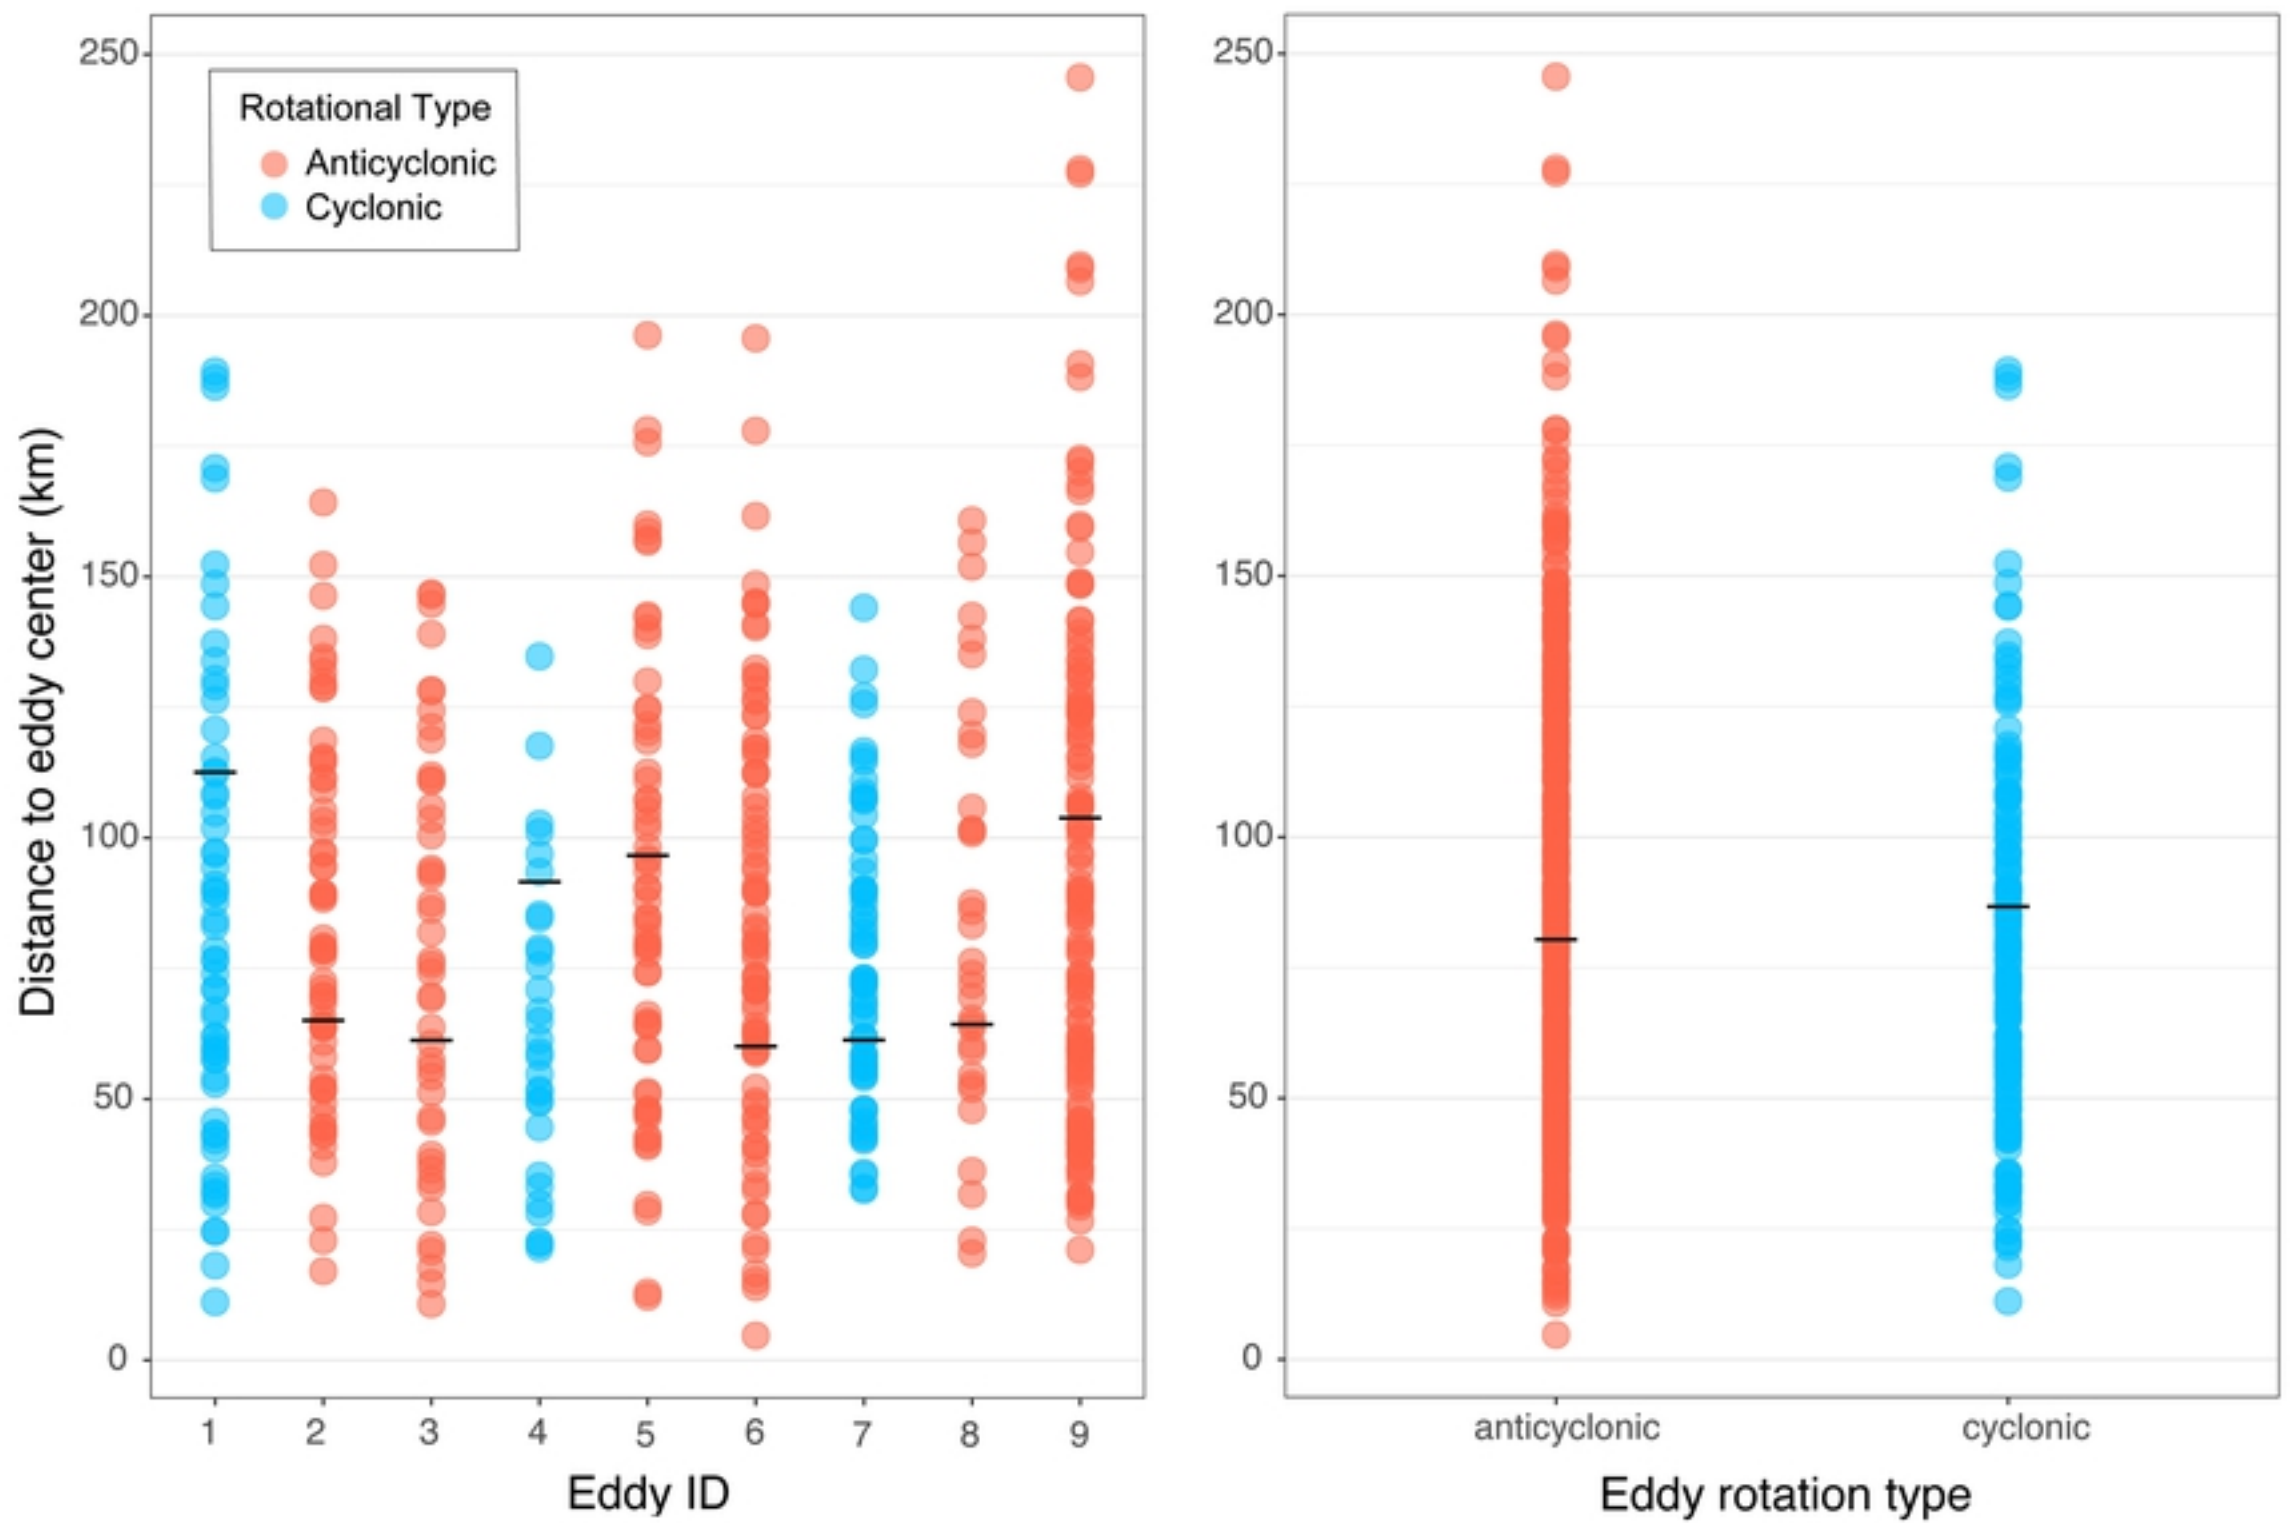

Figure 1

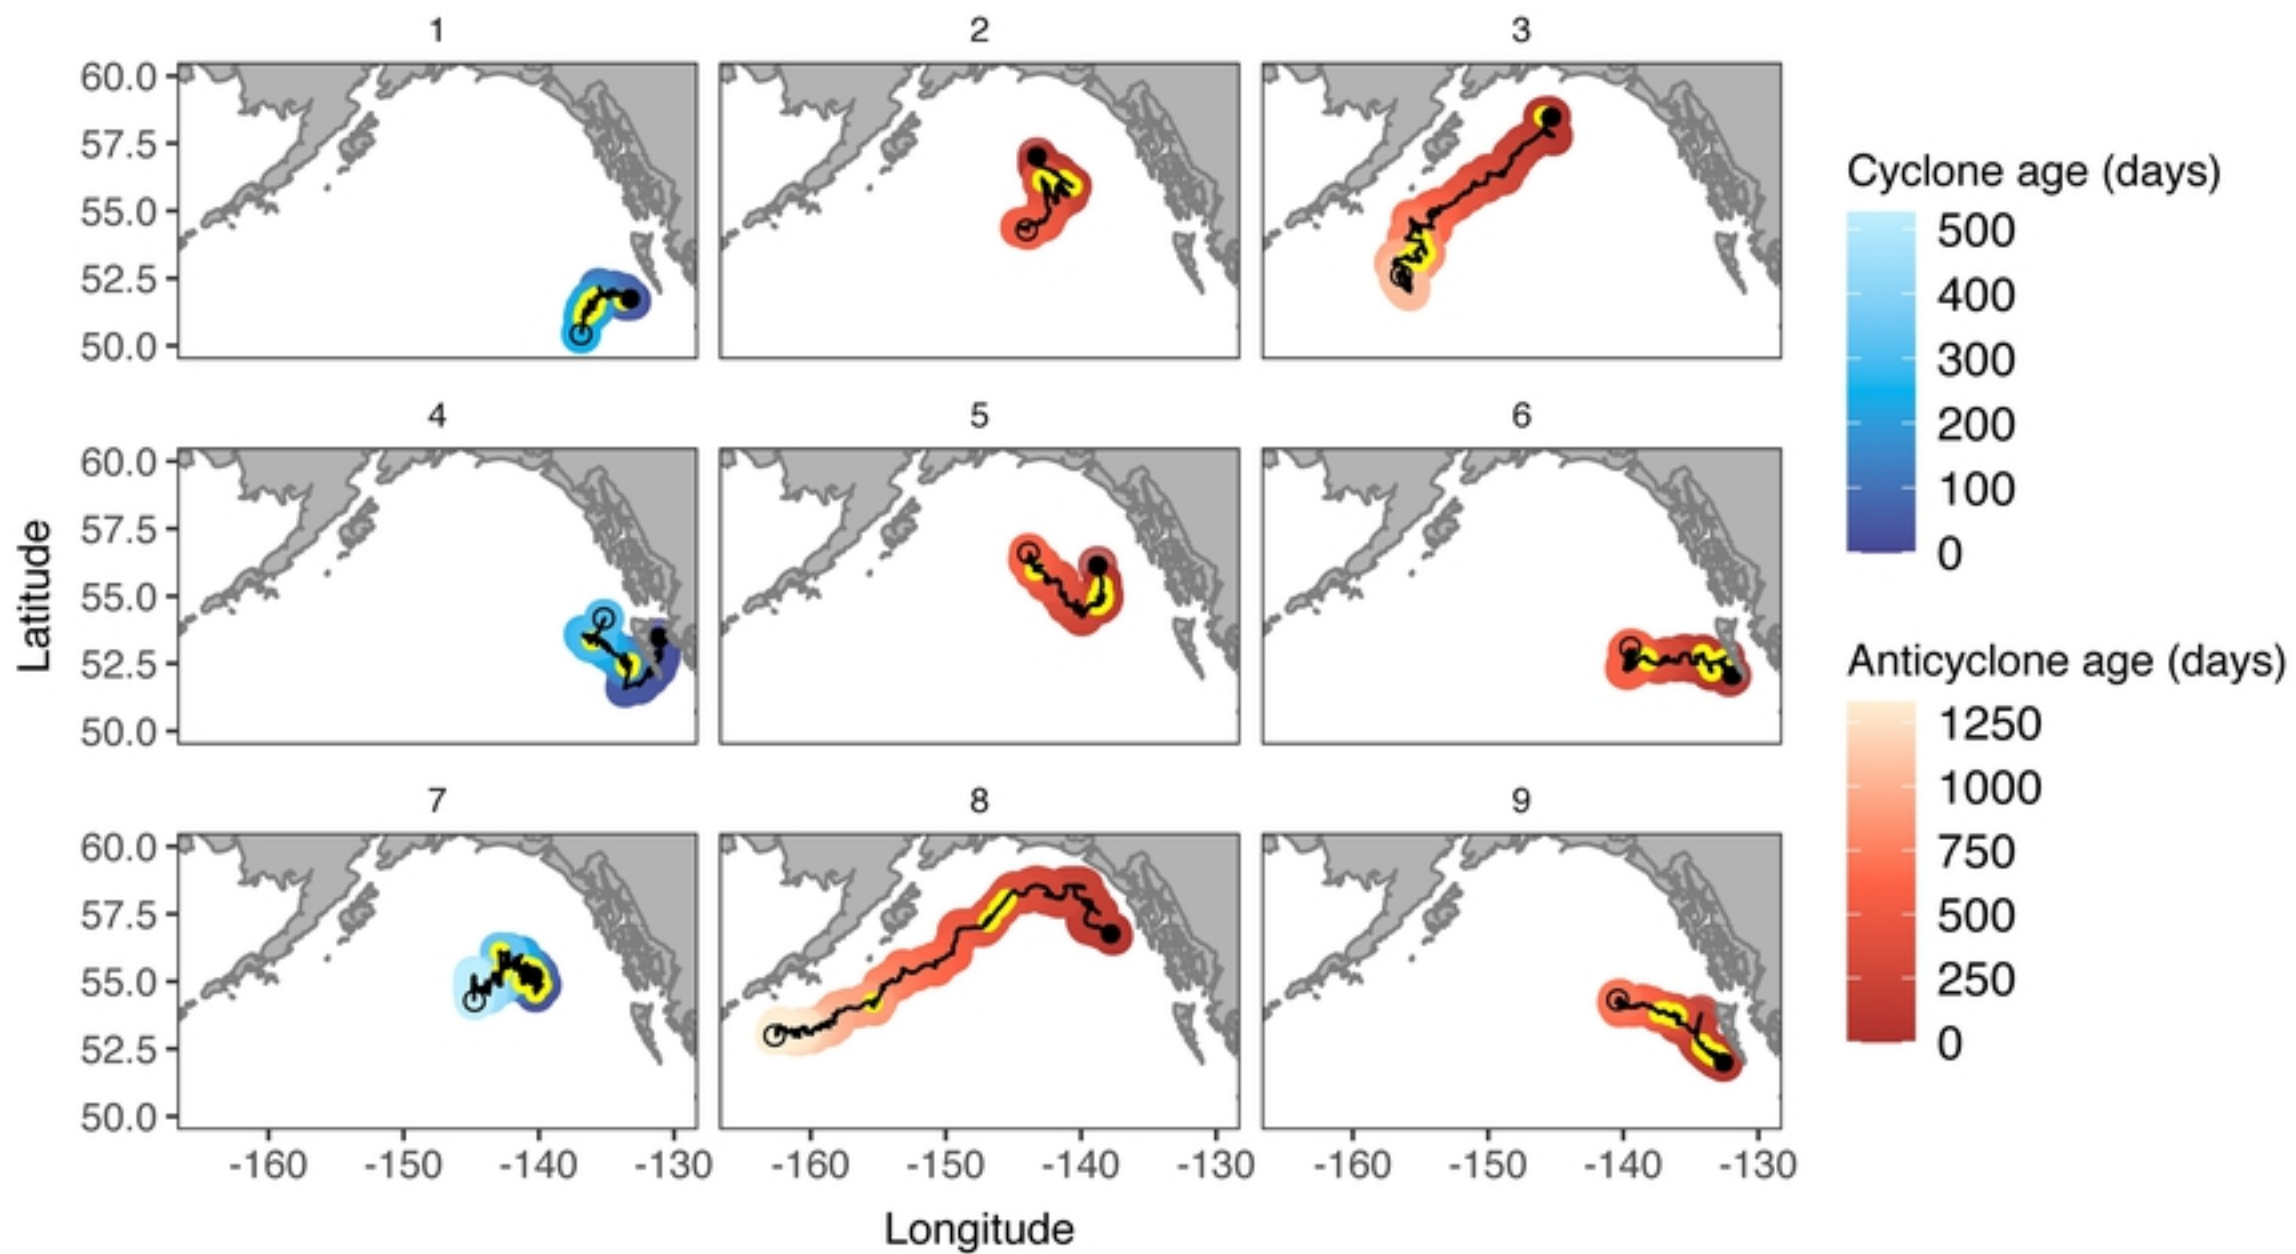

Figure 2

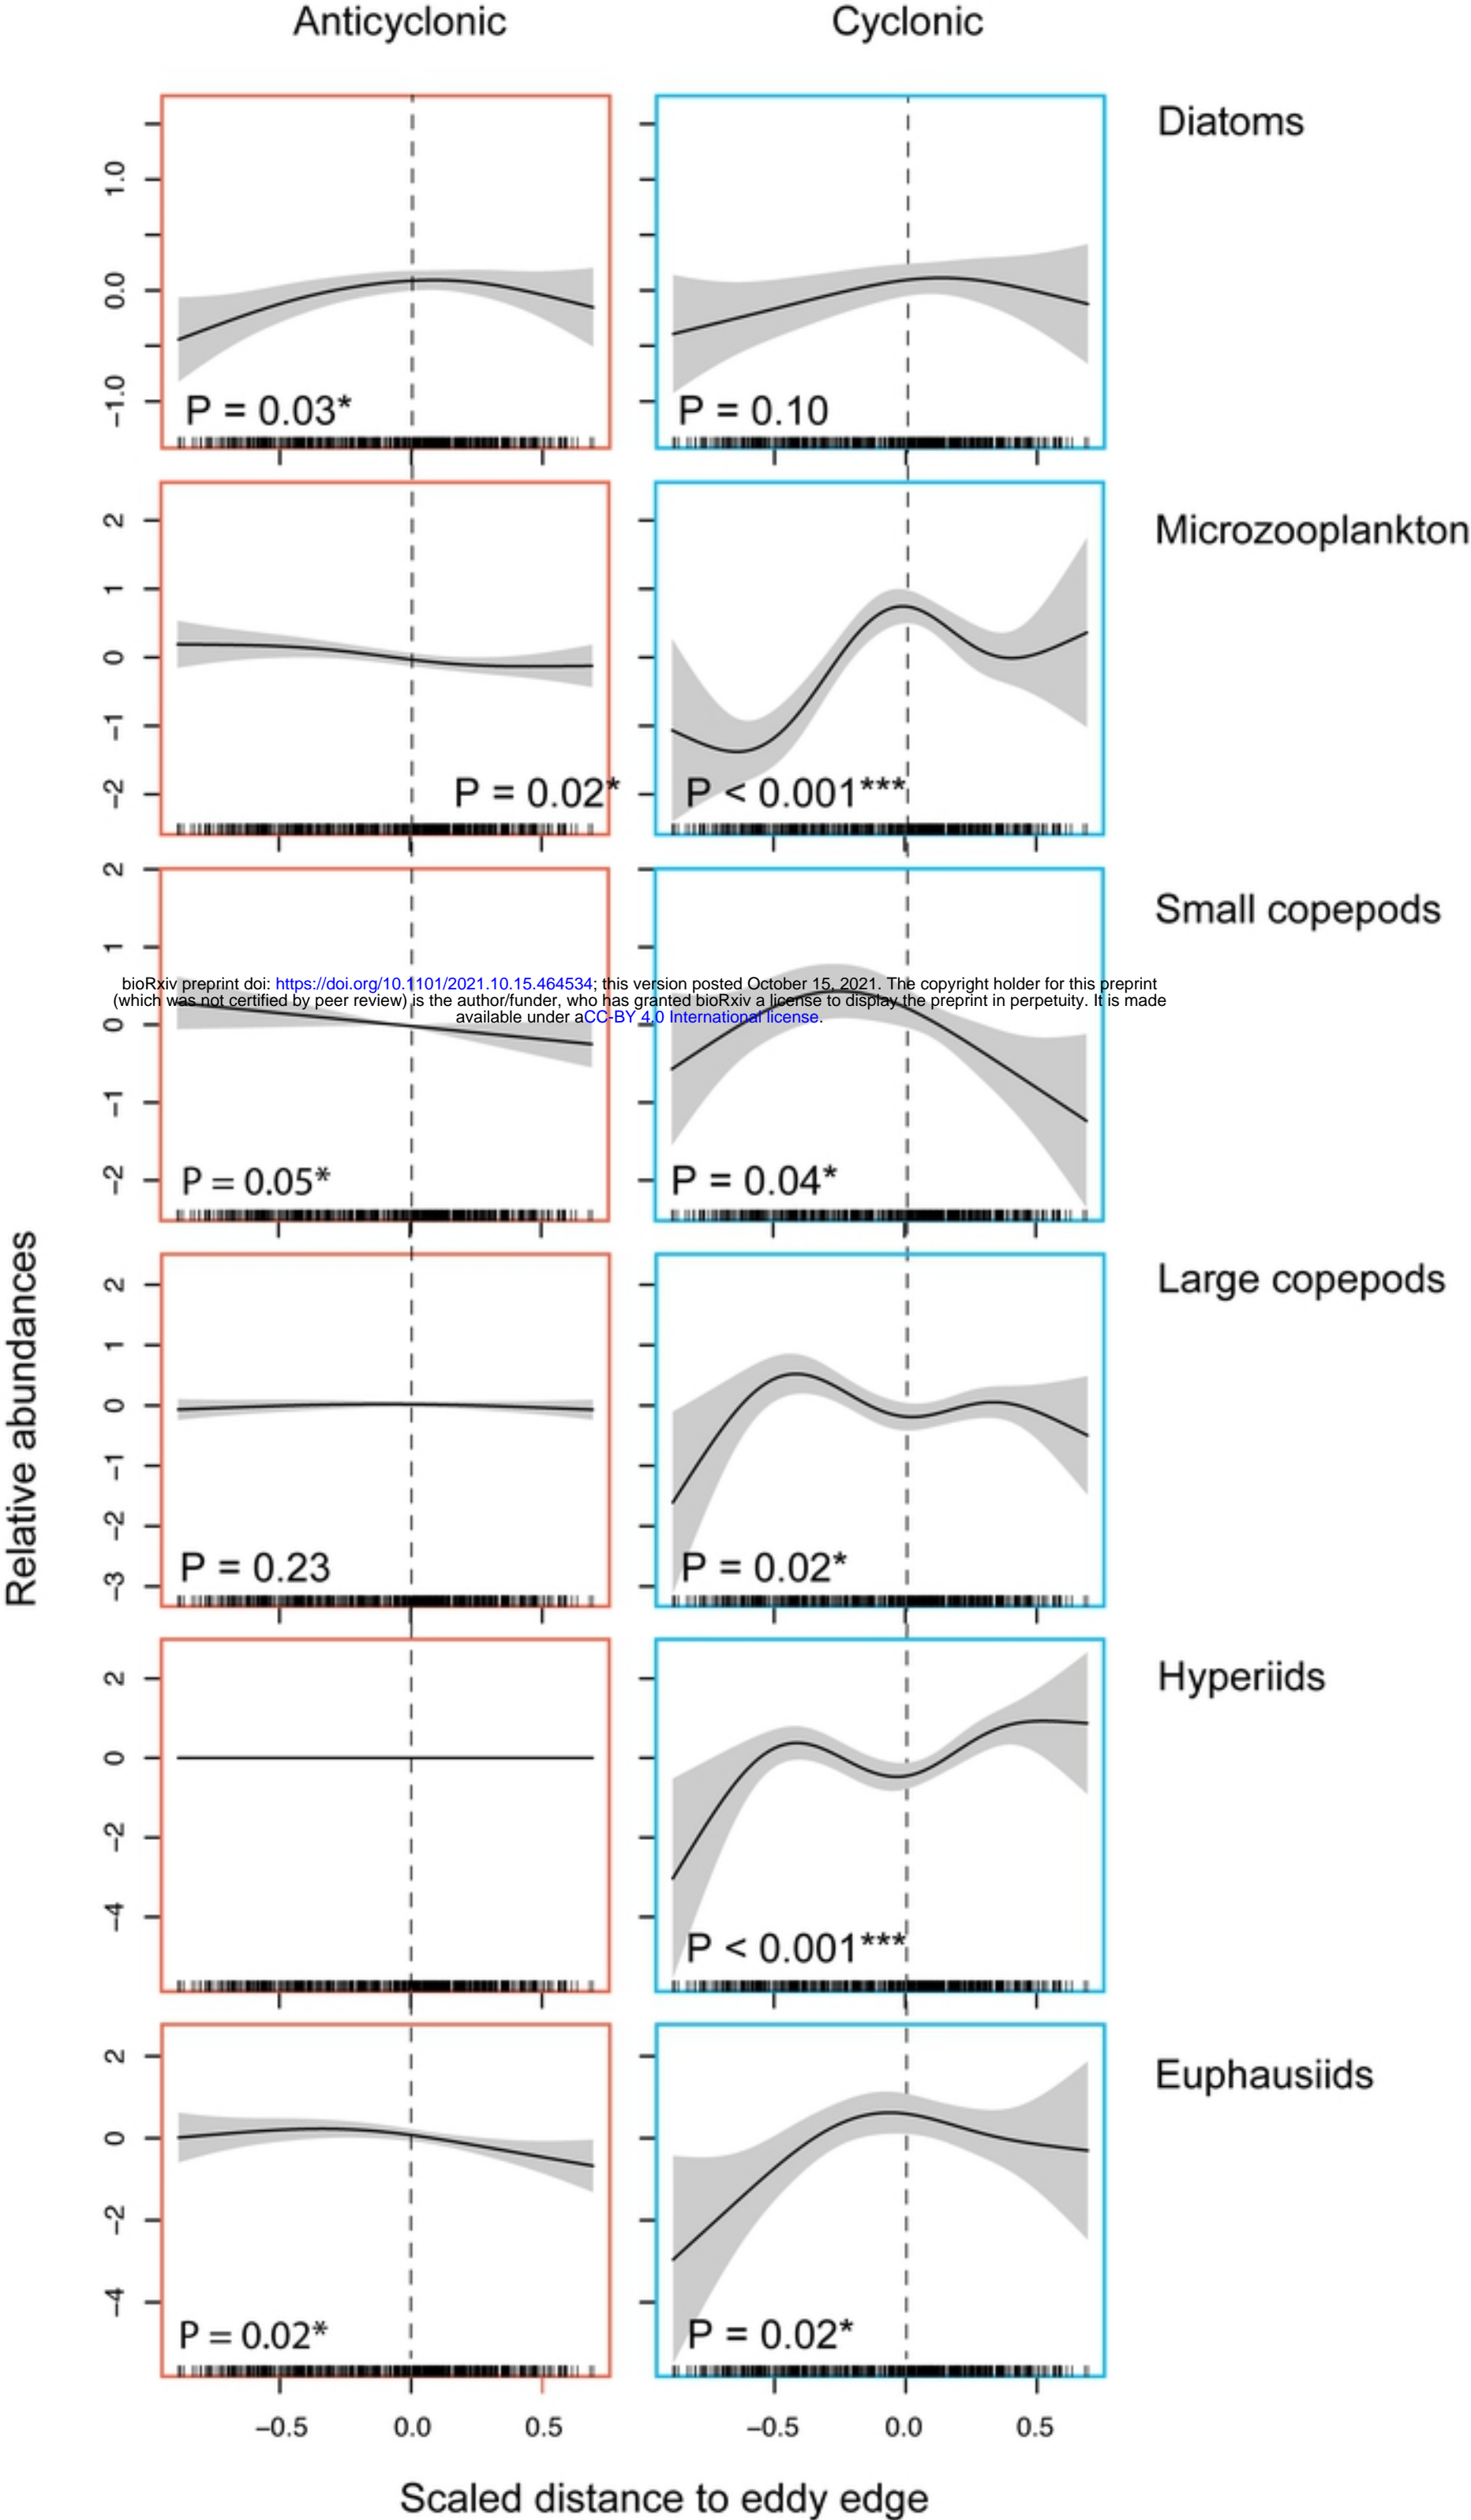

Figure 3

# Haida Region

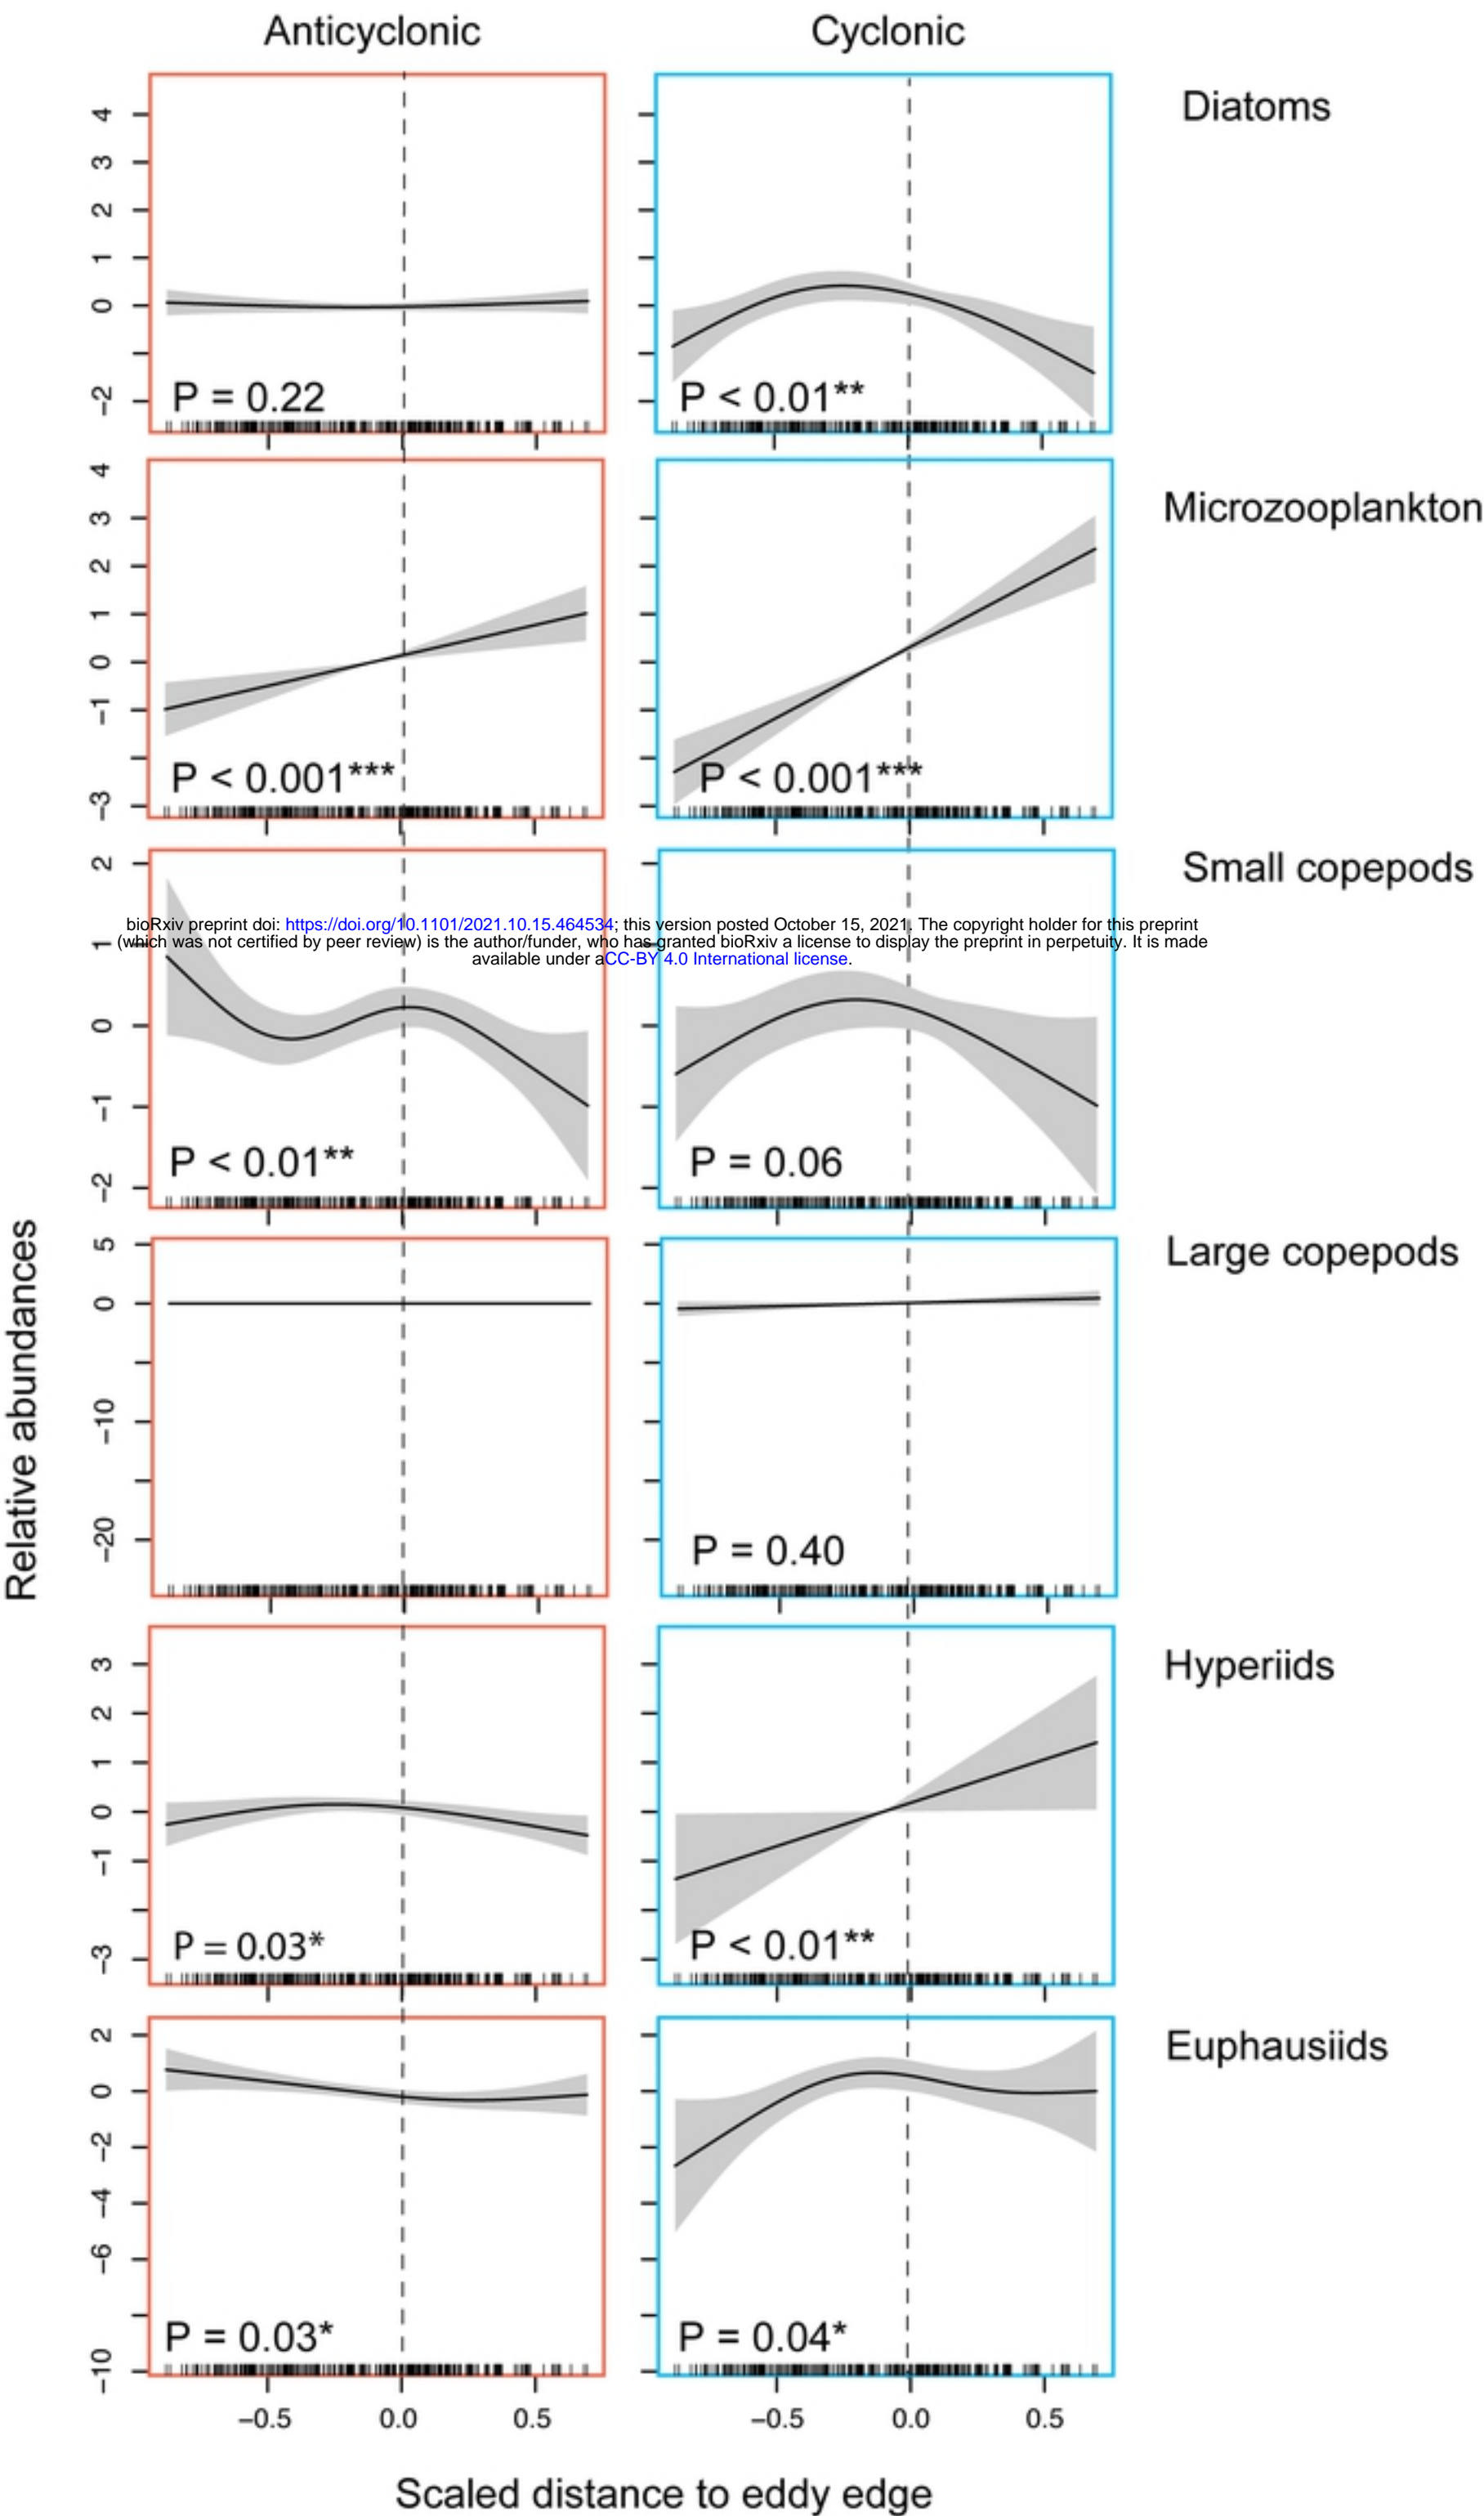

Figure 4



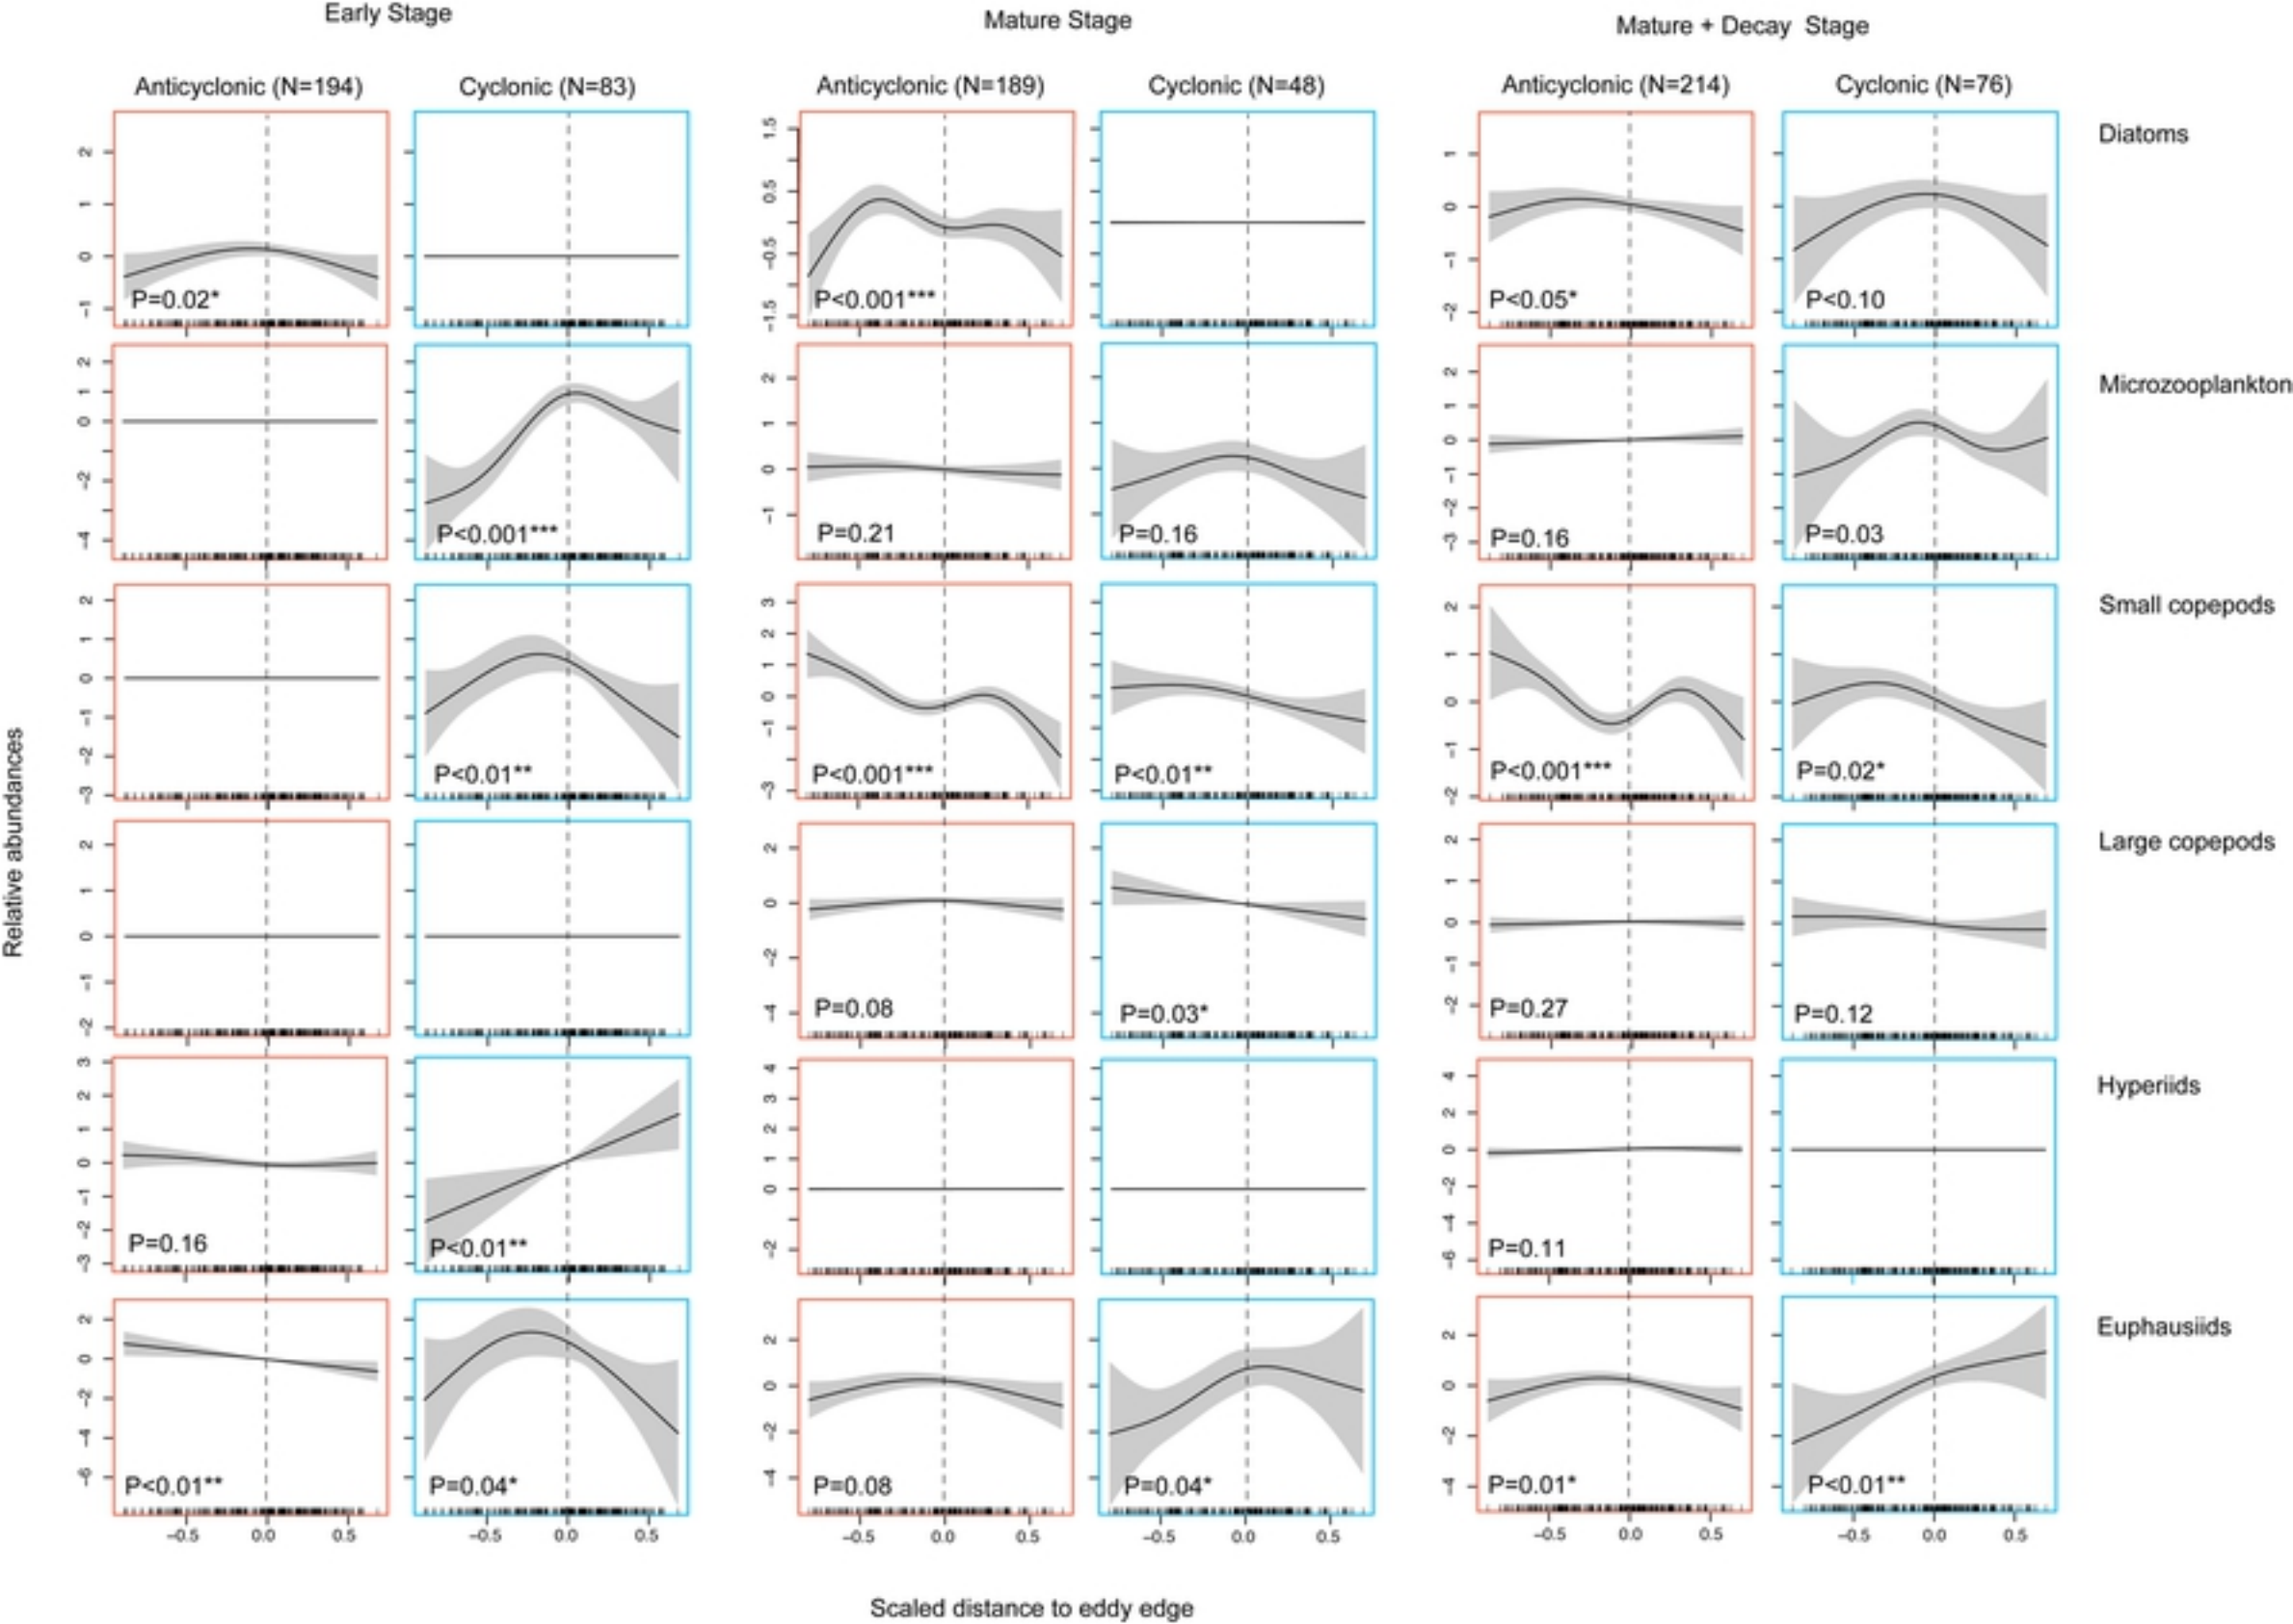

Figure 5

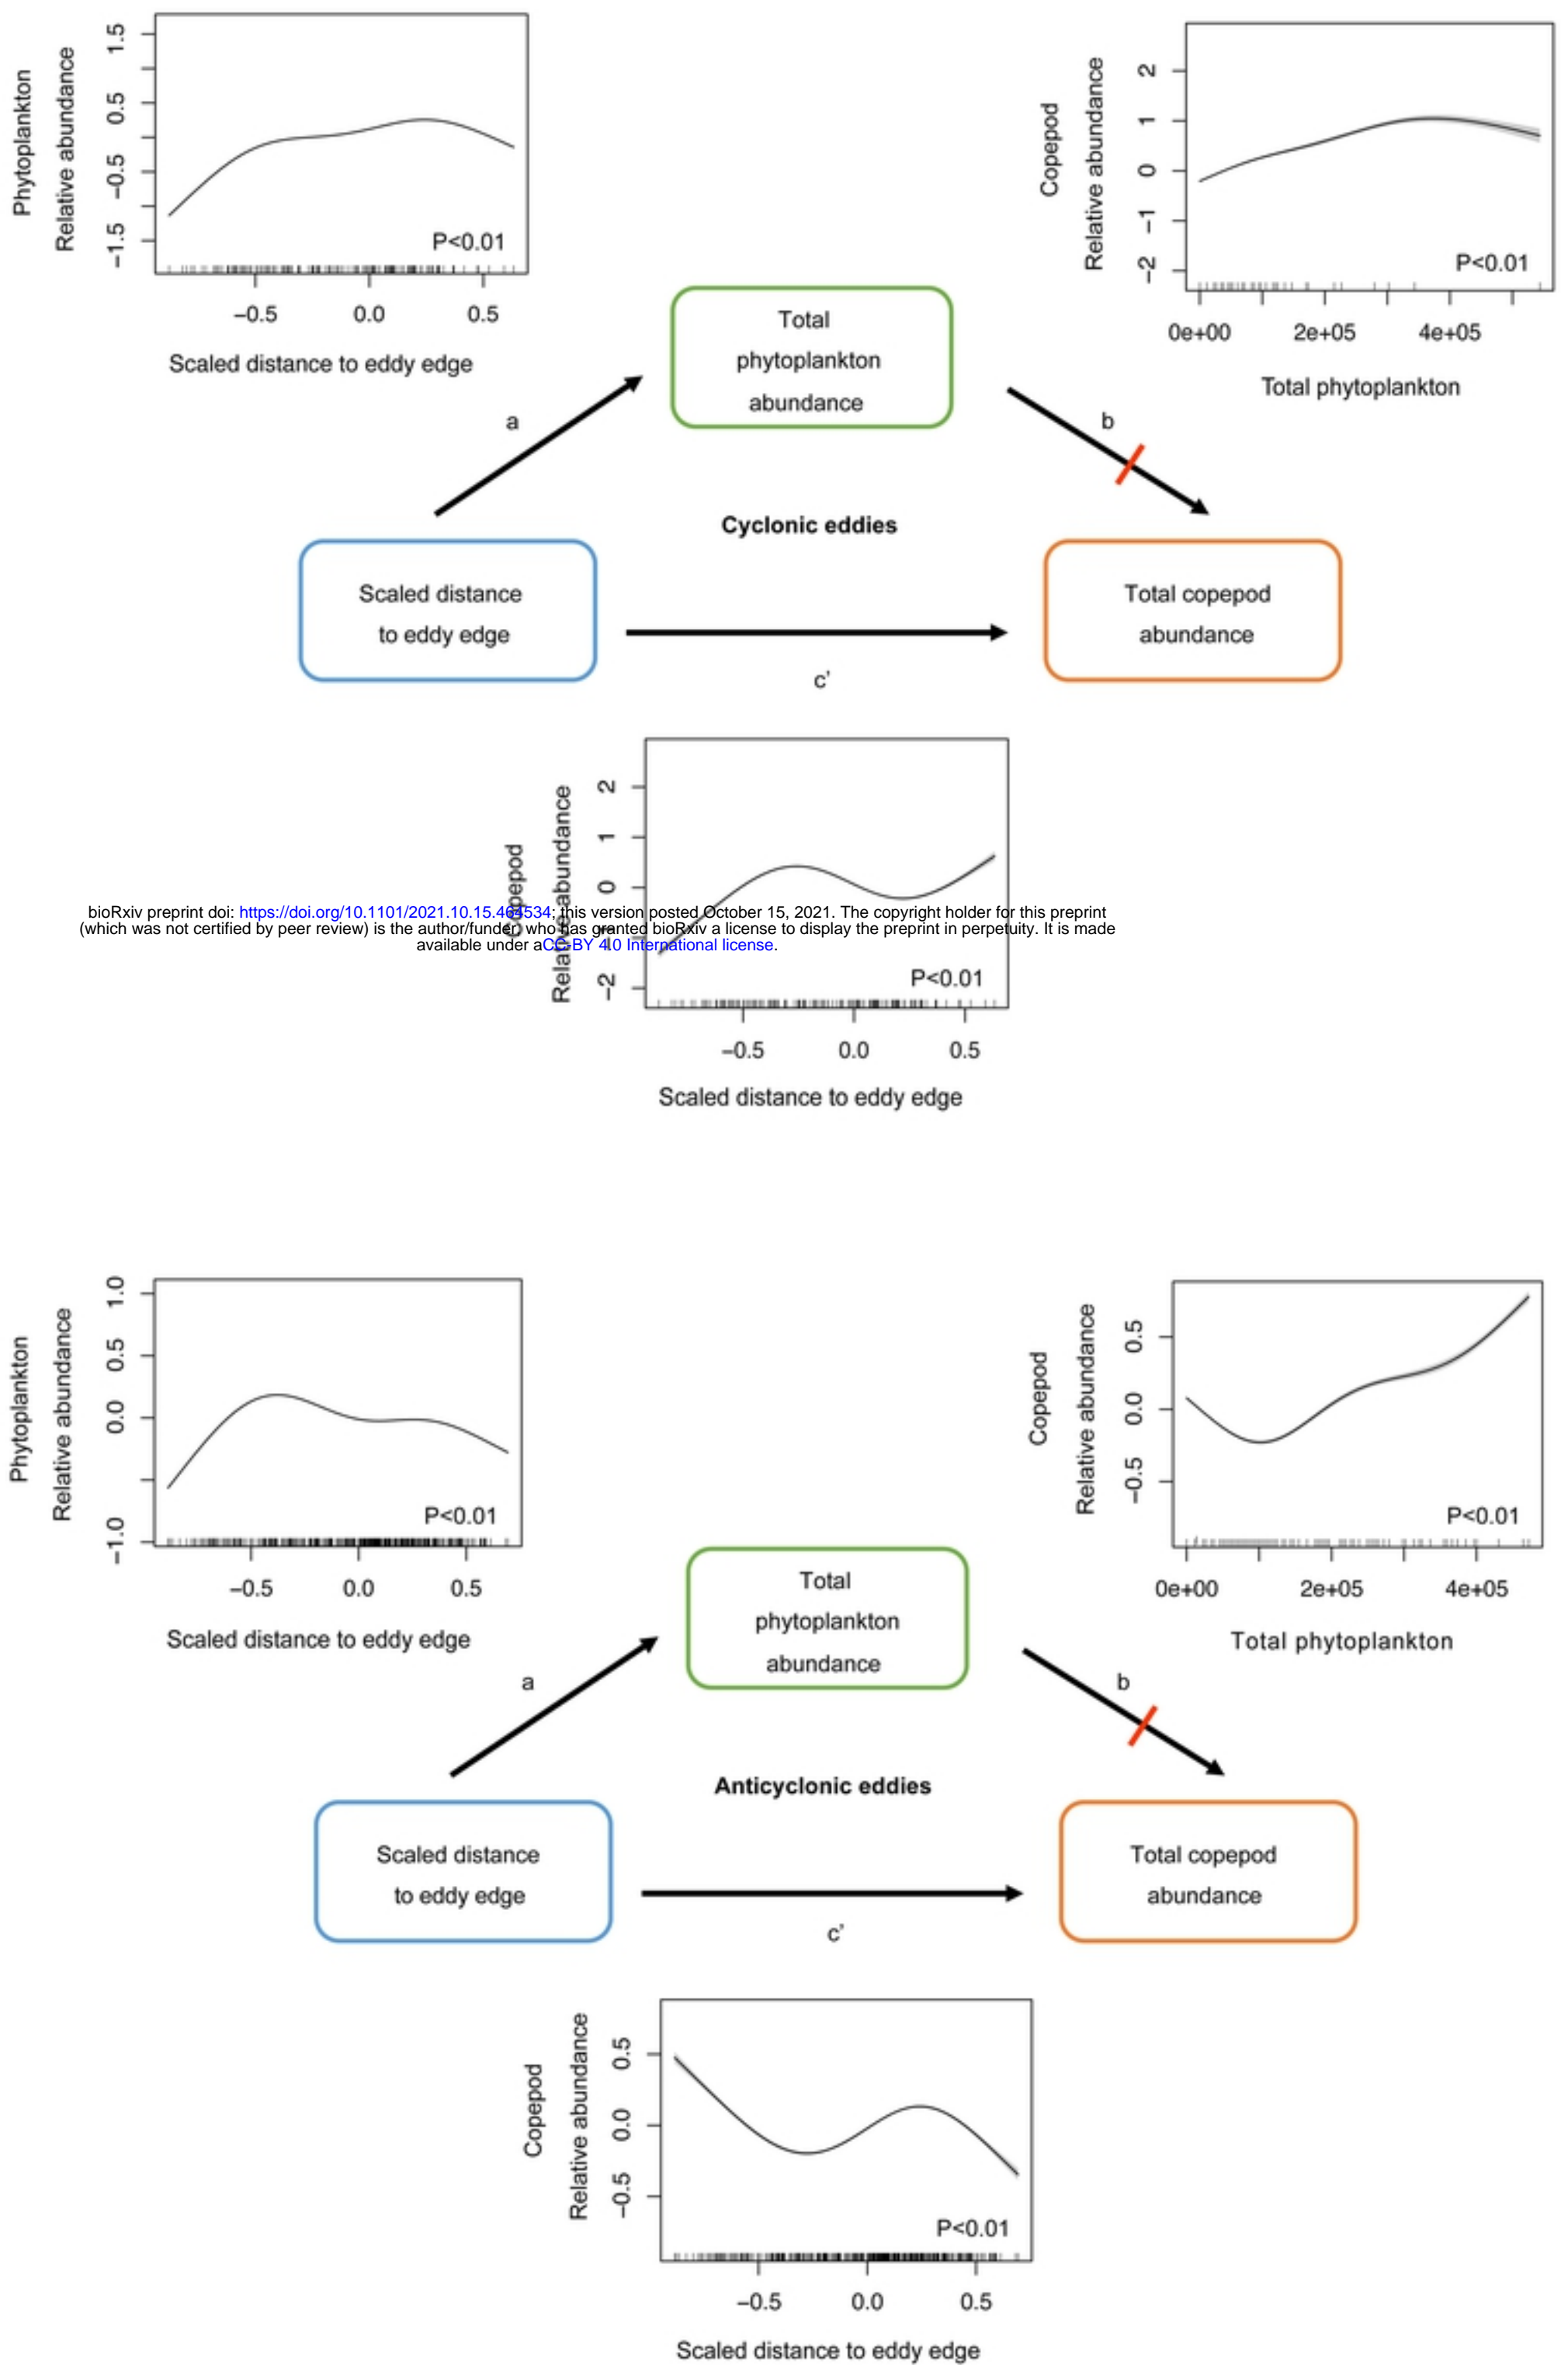

bioRxiv preprint doi: <https://doi.org/10.1101/2021.10.15.463534>; this version posted October 15, 2021. The copyright holder for this preprint (which was not certified by peer review) is the author/funder, who has granted bioRxiv a license to display the preprint in perpetuity. It is made available under aCC-BY 4.0 International license.

Figure 6
